# Supplementary material
Source: PubMed Central journal article supplement (PMC5915188)
Supplement: EHP1302.s001.acco.pdf [file EHP1302.s001.acco.pdf]

**Note to readers with disabilities:** *EHP* strives to ensure that all journal content is accessible to all readers. However, some figures and Supplemental Material published in *EHP* articles may not conform to [508 standards](#) due to the complexity of the information being presented. If you need assistance accessing journal content, please contact [ehp508@niehs.nih.gov](mailto:ehp508@niehs.nih.gov). Our staff will work with you to assess and meet your accessibility needs within 3 working days.

### **Supplemental Material**

#### **Serum Polybrominated Biphenyls (PBBs) and Polychlorinated Biphenyls (PCBs) and Thyroid Function among Michigan Adults Several Decades after the 1973-1974 PBB Contamination of Livestock Feed**

Melanie H. Jacobson, Lyndsey A. Darrow, Dana Boyd Barr, Penelope P. Howards, Robert H. Lyles, Metrecia L. Terrell, Alicia K. Smith, Karen N. Conneely, M. Elizabeth Marder, and Michele Marcus

### **Table of Contents**

**Figure S1.** Study population flowchart for analysis of thyroid disease and thyroid hormones, Michigan PBB Registry

**Figure S2.** Directed acyclic graph (DAG) illustrating relationships between serum PBBs/PCBs, thyroid function, and covariates

**Figure S3.** Directed acyclic graph (DAG) illustrating relationships between PBBs/PCBs, lipids, and thyroid function

**Table S1.** Serum PCB congener (ng/mL serum and ng/g lipid) concentrations by population characteristics in Michigan adults, 2004-2015 (n=753 individuals, n=801 samples)

**Table S2.** Serum PBB and PCB concentrations (ng/mL and ng/g lipid) by population characteristics in Michigan adults without thyroid disease 2004-2015 (n=551 individuals, n=571 samples)

**Table S3.** Adjusted Odds Ratios (aOR) and 95% Confidence Intervals (95% CI) for the association between PBB-153, PCB-118 and  $\Sigma$ PCB (ng/g lipid) and thyroid disease among Michigan females, 2004-2015.

**Table S4.** Adjusted Odds Ratios (aOR) and 95% Confidence Intervals (95% CI) for the association between PCB-138, PCB-153, and PCB-180 (ng/ml) and thyroid disease among Michigan females, 2004-2015.

**Table S5.** Adjusted Odds Ratios (aOR) and 95% Confidence Intervals (95% CI) for the association between PCB-138, PCB-153, and PCB-180 (ng/g lipid) and thyroid disease among Michigan females, 2004-2015.

**Table S6.** Thyroid hormone levels by population characteristics in Michigan adults without thyroid disease, 2004-2015 (n=551 individuals, n=571 samples)

**Table S7.**  $\beta$ -Coefficients and 95% confidence intervals (95% CI) from regression models for associations of ln-transformed PBB and PCB congeners (ng/g lipid) with thyroid-stimulating hormone (TSH) and other thyroid hormones among Michigan adults without thyroid disease (N=571 samples, 551 individuals), 2004-2015

**Table S8.** Distribution of thyroid hormones among Michigan women and men without thyroid disease, 2004-2015

**Table S9.**  $\beta$ -Coefficients and 95% confidence intervals (95% CI) from regression models for associations of PBB-153, PCB-118 and  $\Sigma$ PCB (ng/mL) deciles with TSH and other thyroid hormones among women without a history of thyroid disease (N=343 women, 363 samples)

**Table S10.**  $\beta$ -Coefficients and 95% confidence intervals (95% CI) from regression models for associations of PBB-153, PCB-118 and  $\Sigma$ PCB (ng/mL) deciles with TSH and other thyroid hormones among men without a history of thyroid disease (N=208)

**Table S11.**  $\beta$ -Coefficients and 95% confidence intervals (95% CI) from regression models for associations of PCB-138, 153, and 180 (ng/mL) deciles with TSH and other thyroid hormones among women without a history of thyroid disease (N=343 women, 363 samples)

**Table S12.**  $\beta$ -Coefficients and 95% confidence intervals (95% CI) from regression models for associations of PCB-138, 153, and 180 (ng/mL) deciles with TSH and other thyroid hormones among men without a history of thyroid disease (N=208)

## References

**Figure S1. Study population flowchart for analysis of thyroid disease and thyroid hormones, Michigan PBB Registry**

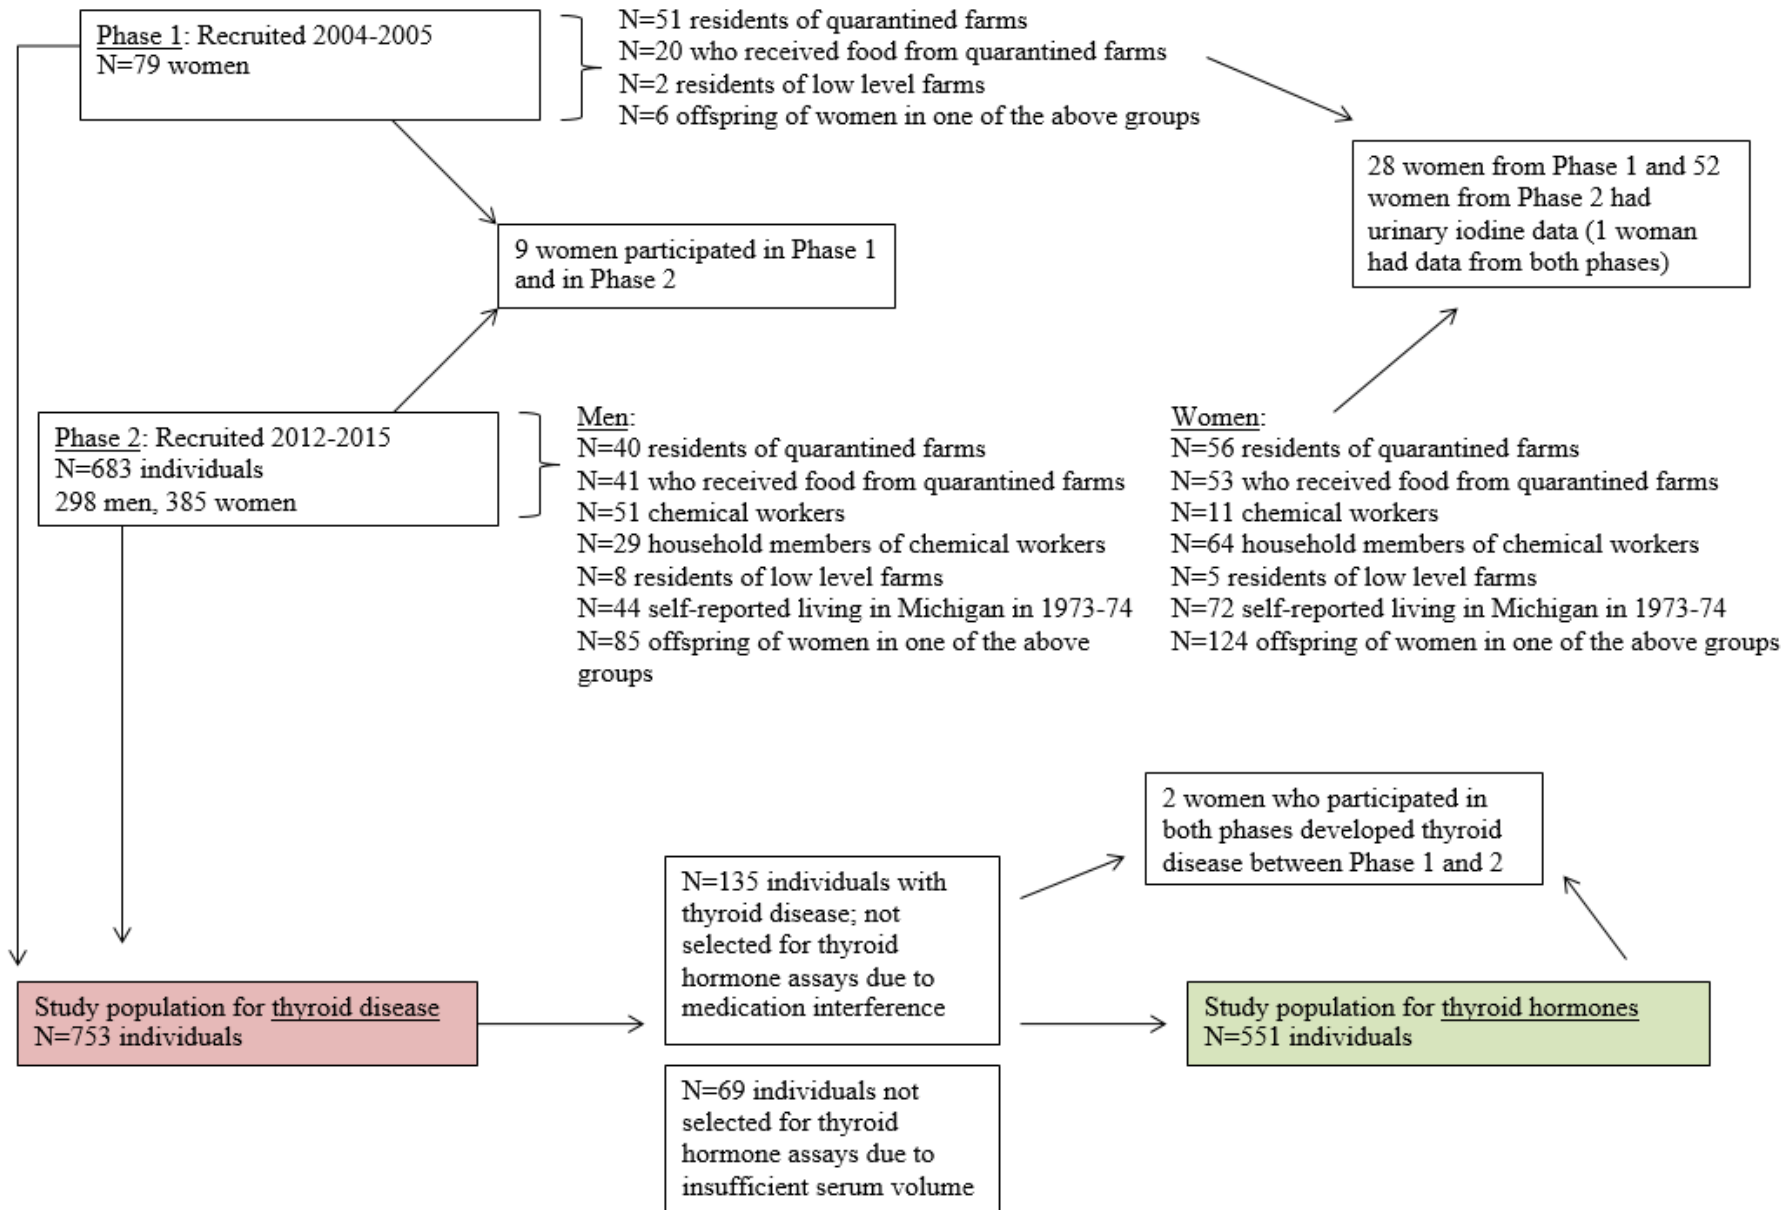

Note: Those individuals in the group “self-reported living in MI in 1973-74” were not able to be identified by electronic files maintained by the Registry.

**Figure S2. Directed acyclic graph (DAG) illustrating relationships between serum PBBs/PCBs, thyroid function, and covariates**

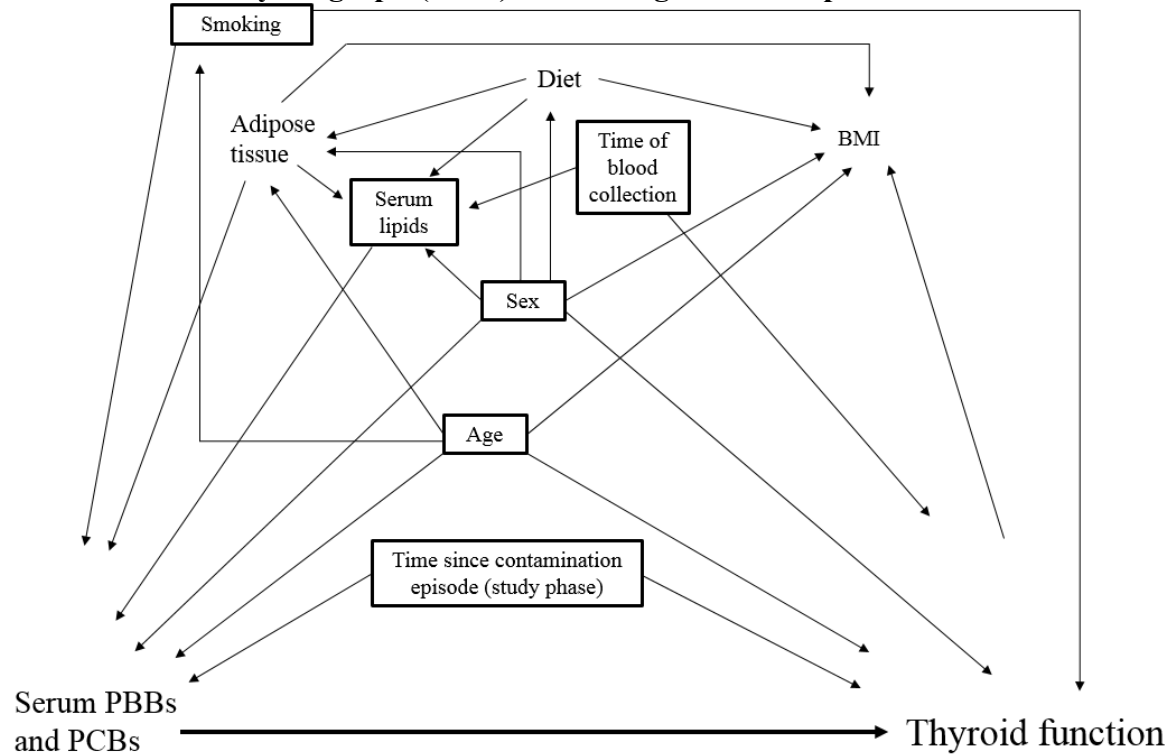

Abbreviations: PBBs: polybrominated biphenyls; PCBs: polychlorinated biphenyls; BMI: body mass index

**Figure S3. Directed acyclic graph (DAG) illustrating relationships between PBBs/PCBs, lipids, and thyroid function**

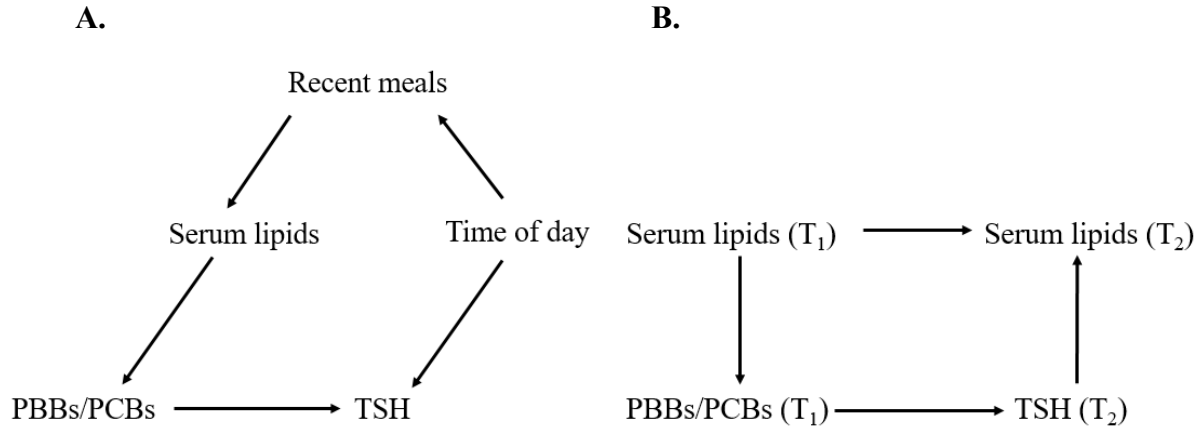

Abbreviations: PBBs: polybrominated biphenyls; PCBs: polychlorinated biphenyls; TSH: thyroid-stimulating hormone; T<sub>1</sub>: Time 1; T<sub>2</sub>: Time 2.

In DAG A, serum lipids could act as a confounder due to recently eaten meals and the backdoor path due to the diurnal variation in TSH that occurs throughout the day. However, it has been shown that thyroid hormones may influence lipid metabolism (Duntas and Brenta 2012; Pucci et al. 2000; Reinehr 2010; Rizos et al. 2011), although there is some uncertainty as to whether subclinical variation in thyroid hormones affect lipid levels (Tagliaferri et al. 2001). Still, in order to address this, we developed DAG B. Ideally, we would have multiple time measurements (as shown in DAG B), and in our study, we assume we have measured some sort of proxy of the two serum lipid measures shown here. In this scenario, lipids would not be a confounder and thus controlling for it would be unjustified. In this case, models should not adjust for lipids at all (either as a covariate or expressing PBBs/PCBs on the lipid basis (ng/g lipid)), and when we ran all models this way, results were nearly identical to when we expressed PBBs/PCBs on the wet weight basis (ng/mL) and controlled for lipids as

**Table S1. Serum PCB congener (ng/mL serum and ng/g lipid) concentrations by population characteristics in Michigan adults, 2004-2015 (n=753 individuals, n=801 samples)**

| Characteristics                | Study sample<br>N (%) | PCB-138 (GM)<br>ng/mL (ng/g lipid) | PCB-153 (GM)<br>ng/mL (ng/g lipid) | PCB-180 (GM)<br>ng/mL (ng/g lipid) |
|--------------------------------|-----------------------|------------------------------------|------------------------------------|------------------------------------|
| Sex                            |                       |                                    |                                    |                                    |
| Female                         | 455 (60.4%)           | 0.16 (24.0)*                       | 0.18 <sup>#</sup> (26.2)*          | 0.12* (17.4)*                      |
| Male                           | 298 (39.6%)           | 0.18 (29.1)                        | 0.21 (34.1)                        | 0.17 (27.8)                        |
| Age at blood draw <sup>a</sup> |                       |                                    |                                    |                                    |
| 18-29                          | 100 (13.3%)           | 0.10* (16.7)*                      | 0.11* (17.4)*                      | 0.06* (9.7)*                       |
| 30-39                          | 176 (23.4%)           | 0.10 (15.5)                        | 0.10 (16.9)                        | 0.07 (10.9)                        |
| 40-49                          | 153 (20.3%)           | 0.16 (22.9)                        | 0.18 (25.6)                        | 0.12 (17.8)                        |
| 50-59                          | 150 (19.9%)           | 0.24 (34.1)                        | 0.28 (39.7)                        | 0.22 (30.8)                        |
| ≥60                            | 186 (24.7%)           | 0.31 (47.8)                        | 0.37 (56.4)                        | 0.32 (49.6)                        |
| Age at PBB contamination       |                       |                                    |                                    |                                    |
| ≥16 at contamination           | 226 (30.0%)           | 0.30* (45.3)*                      | 0.35* (53.3)*                      | 0.30* (46.1)*                      |
| 0-15 at contamination          | 315 (41.8%)           | 0.16 (24.5)                        | 0.19 (27.9)                        | 0.14 (20.2)                        |
| Born after contamination       | 212 (28.2%)           | 0.10 (15.6)                        | 0.10 (16.5)                        | 0.06 (9.6)                         |
| Study years <sup>a</sup>       |                       |                                    |                                    |                                    |
| 2004-2005                      | 79 (10.5%)            | 0.10* (16.8)*                      | 0.11* (19.1)*                      | 0.08* (13.8)*                      |
| 2012-2015                      | 683 (90.7%)           | 0.18 (27.1)                        | 0.20 (30.4)                        | 0.15 (21.8)                        |
| Body mass index <sup>a</sup>   |                       |                                    |                                    |                                    |
| ≤Normal                        | 155 (31.1%)           | 0.13 (20.0)                        | 0.15 (22.8)                        | 0.11 (16.6)                        |
| Overweight                     | 156 (31.3%)           | 0.14 (21.4)                        | 0.16 (23.9)                        | 0.11 (16.0)                        |
| Obese                          | 190 (38.2%)           | 0.14 (22.6)                        | 0.15 (23.9)                        | 0.10 (15.2)                        |
| Missing                        | 255                   |                                    |                                    |                                    |
| Smoking status                 |                       |                                    |                                    |                                    |
| Current smokers                | 120 (16.1%)           | 0.15* (22.2)*                      | 0.16* (24.7)*                      | 0.12* (17.9)*                      |
| Former smokers                 | 182 (24.4%)           | 0.21 (31.3)                        | 0.24 (35.9)                        | 0.19 (28.2)                        |
| Never smokers                  | 444 (59.5%)           | 0.16 (24.9)                        | 0.18 (27.8)                        | 0.13 (19.3)                        |
| Missing                        | 7                     |                                    |                                    |                                    |

Abbreviations: GM: Geometric mean

\*P<0.01; <sup>#</sup>P<0.05; <sup>†</sup>P<0.10; P-values computed using t-tests or ANOVA using log-transformed PCB concentrations for comparison between categories.

<sup>a</sup>N=36 individuals participated twice and N=6 three times over time, thus cell counts sum to >753 and percents sum to >100%.

**Table S2. Serum PBB and PCB concentrations (ng/mL and ng/g lipid) by population characteristics in Michigan adults without thyroid disease 2004-2015 (n=551 individuals, n=571 samples)**

| Characteristic                                   | Study sample<br>N (%) | PBB-153 (GM)<br>ng/mL (ng/g lipid) | PCB-118 <sup>a</sup> (GM)<br>ng/mL (ng/g lipid) | PCB-138 (GM)<br>ng/mL (ng/g lipid) | PCB-153 (GM)<br>ng/mL (ng/g lipid) | PCB-180 (GM)<br>ng/mL (ng/g lipid) | ∑PCB (di-ortho) <sup>b</sup><br>(GM)<br>ng/mL (ng/g lipid) |
|--------------------------------------------------|-----------------------|------------------------------------|-------------------------------------------------|------------------------------------|------------------------------------|------------------------------------|------------------------------------------------------------|
| Sex                                              |                       |                                    |                                                 |                                    |                                    |                                    |                                                            |
| Female                                           | 343 (62.3)            | 0.12 (18.0)                        | 0.05 (6.8)                                      | 0.15 (21.2)                        | 0.16 (23.1)                        | 0.10 (15.0)                        | 0.41 (60.2)                                                |
| Male                                             | 208 (37.7)            | 0.55 (86.8)                        | 0.06 (9.0)                                      | 0.22 (34.5)                        | 0.26 (41.4)                        | 0.23 (36.6)                        | 0.73 (114.9)                                               |
| Age at blood draw <sup>c</sup>                   |                       |                                    |                                                 |                                    |                                    |                                    |                                                            |
| 18-29                                            | 62 (11.3)             | 0.01 (1.5)                         | 0.03 (4.5)                                      | 0.10 (15.5)                        | 0.11 (16.1)                        | 0.06 (8.3)                         | 0.27 (40.3)                                                |
| 30-39                                            | 126 (22.9)            | 0.14 (23.2)                        | 0.03 (4.5)                                      | 0.10 (16.2)                        | 0.11 (17.4)                        | 0.07 (11.3)                        | 0.28 (45.6)                                                |
| 40-49                                            | 118 (21.4)            | 0.25 (36.1)                        | 0.05 (6.8)                                      | 0.16 (22.2)                        | 0.18 (25.1)                        | 0.12 (17.7)                        | 0.46 (65.9)                                                |
| 50-59                                            | 117 (21.2)            | 0.43 (59.6)                        | 0.06 (7.9)                                      | 0.22 (30.7)                        | 0.26 (36.1)                        | 0.21 (28.9)                        | 0.70 (97.1)                                                |
| ≥60                                              | 135 (24.5)            | 0.62 (97.0)                        | 0.09 (13.3)                                     | 0.30 (47.1)                        | 0.36 (56.3)                        | 0.33 (50.5)                        | 1.02 (157.8)                                               |
| Age at contamination                             |                       |                                    |                                                 |                                    |                                    |                                    |                                                            |
| ≥16 years at contamination                       | 167 (30.3)            | 0.58 (90.0)                        | 0.08 (12.2)                                     | 0.28 (43.6)                        | 0.34 (51.8)                        | 0.30 (46.1)                        | 0.94 (145.0)                                               |
| 0-15 years at contamination                      | 254 (46.1)            | 0.43 (64.1)                        | 0.05 (7.3)                                      | 0.16 (23.2)                        | 0.18 (26.6)                        | 0.13 (19.6)                        | 0.47 (70.5)                                                |
| Born after contamination                         | 130 (23.6)            | 0.02 (2.4)                         | 0.03 (4.5)                                      | 0.11 (15.6)                        | 0.11 (16.1)                        | 0.06 (8.9)                         | 0.28 (41.0)                                                |
| Study years <sup>c</sup>                         |                       |                                    |                                                 |                                    |                                    |                                    |                                                            |
| 2004-2005                                        | 74 (13.4)             | 1.04 (187.1)                       | -                                               | 0.10 (17.4)                        | 0.11 (19.7)                        | 0.08 (14.3)                        | 0.29 (52.2)                                                |
| 2012-2015                                        | 483 (87.7)            | 0.17 (24.5)                        | 0.05 (7.6)                                      | 0.18 (26.8)                        | 0.21 (30.2)                        | 0.15 (21.9)                        | 0.55 (80.6)                                                |
| Time of blood collection <sup>c</sup>            |                       |                                    |                                                 |                                    |                                    |                                    |                                                            |
| 7:00am-10:30am                                   | 90 (16.4)             | 0.24 (36.5)                        | 0.04 (6.0)                                      | 0.13 (19.3)                        | 0.15 (22.4)                        | 0.11 (16.4)                        | 0.39 (59.2)                                                |
| 10:30am-3:00pm                                   | 288 (52.4)            | 0.26 (40.4)                        | 0.05 (7.5)                                      | 0.16 (25.0)                        | 0.19 (28.5)                        | 0.14 (21.8)                        | 0.51 (77.1)                                                |
| 3:00pm-8:00pm                                    | 182 (33.1)            | 0.15 (21.1)                        | 0.06 (8.6)                                      | 0.21 (29.8)                        | 0.23 (32.8)                        | 0.15 (21.8)                        | 0.59 (86.0)                                                |
| Missing                                          | 1                     |                                    |                                                 |                                    |                                    |                                    |                                                            |
| Body mass index <sup>c</sup>                     |                       |                                    |                                                 |                                    |                                    |                                    |                                                            |
| ≤ Normal                                         | 125 (34.1)            | 0.17 (24.7)                        | 0.04 (5.3)                                      | 0.13 (19.0)                        | 0.15 (21.7)                        | 0.11 (15.7)                        | 0.40 (57.3)                                                |
| Overweight                                       | 117 (31.9)            | 0.14 (19.8)                        | 0.04 (5.9)                                      | 0.14 (20.2)                        | 0.16 (22.5)                        | 0.11 (15.4)                        | 0.41 (59.1)                                                |
| Obese                                            | 128 (34.9)            | 0.15 (23.0)                        | 0.04 (6.9)                                      | 0.15 (22.9)                        | 0.15 (24.2)                        | 0.10 (15.3)                        | 0.40 (63.3)                                                |
| Missing                                          | 184                   |                                    |                                                 |                                    |                                    |                                    |                                                            |
| Smoking status                                   |                       |                                    |                                                 |                                    |                                    |                                    |                                                            |
| Current smokers                                  | 80 (14.7)             | 0.14 (20.5)                        | 0.04 (6.3)                                      | 0.17 (24.8)                        | 0.19 (27.3)                        | 0.14 (19.8)                        | 0.51 (73.5)                                                |
| Former smokers                                   | 137 (25.2)            | 0.35 (51.3)                        | 0.06 (8.6)                                      | 0.19 (28.7)                        | 0.22 (33.2)                        | 0.18 (27.0)                        | 0.61 (91.1)                                                |
| Never smokers                                    | 327 (60.1)            | 0.20 (30.3)                        | 0.05 (7.6)                                      | 0.16 (24.1)                        | 0.18 (27.2)                        | 0.12 (18.9)                        | 0.47 (71.5)                                                |
| Missing                                          | 7                     |                                    |                                                 |                                    |                                    |                                    |                                                            |
| Iodine status <sup>d</sup>                       |                       |                                    |                                                 |                                    |                                    |                                    |                                                            |
| < 100 µg/g creatinine                            | 14 (17.7)             | 0.05 (7.8)                         | 0.04 (5.3)                                      | 0.11 (16.2)                        | 0.12 (17.7)                        | 0.08 (11.86)                       | 0.31 (46.5)                                                |
| ≥ 100 µg/g creatinine                            | 65 (82.3)             | 0.13 (20.7)                        | 0.04 (5.9)                                      | 0.14 (21.2)                        | 0.15 (23.1)                        | 0.10 (14.81)                       | 0.38 (59.8)                                                |
| < 150 µg/g creatinine                            | 43 (54.4)             | 0.07 (10.6)                        | 0.04 (5.3)                                      | 0.12 (18.5)                        | 0.14 (20.1)                        | 0.09 (12.7)                        | 0.35 (51.9)                                                |
| ≥ 150 µg/g creatinine                            | 37 (46.8)             | 0.19 (31.2)                        | 0.04 (6.6)                                      | 0.14 (22.4)                        | 0.15 (24.5)                        | 0.10 (16.3)                        | 0.40 (64.1)                                                |
| Pregnancy status <sup>c,e</sup>                  |                       |                                    |                                                 |                                    |                                    |                                    |                                                            |
| Pregnant                                         | 5 (1.5)               | 0.02 (2.9)                         | 0.05(9.1)                                       | 0.09 (16.9)                        | 0.10 (18.4)                        | 0.05 (10.06)                       | 0.25 (46.0)                                                |
| Not Pregnant                                     | 323 (98.8)            | 0.13 (18.7)                        | 0.05 (6.4)                                      | 0.14 (20.8)                        | 0.16 (22.7)                        | 0.10 (14.95)                       | 0.41 (59.4)                                                |
| Missing                                          | 16                    |                                    |                                                 |                                    |                                    |                                    |                                                            |
| Menopausal status <sup>c</sup>                   |                       |                                    |                                                 |                                    |                                    |                                    |                                                            |
| Postmenopausal                                   | 39 (14.6)             | 0.32 (41.0)                        | 0.05 (6.9)                                      | 0.22 (28.1)                        | 0.25 (32.3)                        | 0.19 (24.07)                       | 0.67 (85.7)                                                |
| Premenopausal                                    | 228 (85.4)            | 0.09 (14.4)                        | 0.04 (5.3)                                      | 0.12 (17.9)                        | 0.13 (19.2)                        | 0.08 (11.93)                       | 0.33 (49.7)                                                |
| Missing                                          | 76                    |                                    |                                                 |                                    |                                    |                                    |                                                            |
| Current hormonal medication use <sup>c,e,f</sup> |                       |                                    |                                                 |                                    |                                    |                                    |                                                            |
| Yes                                              | 74 (27.9)             | 0.08 (11.4)                        | 0.03(4.5)                                       | 0.12 (17.0)                        | 0.12 (17.9)                        | 0.08 (11.27)                       | 0.32 (46.6)                                                |
| No                                               | 194 (73.2)            | 0.13 (19.4)                        | 0.04 (6.0)                                      | 0.13 (20.1)                        | 0.15 (22.0)                        | 0.09 (14.12)                       | 0.38 (57.0)                                                |
| Missing                                          | 78                    |                                    |                                                 |                                    |                                    |                                    |                                                            |

Abbreviations: GM: Geometric mean

<sup>a</sup>PCB-118 not reportable (missing) for 15.2% of samples due to unstable retention time on laboratory instrument; includes all samples from 2004-2005

<sup>b</sup>PCB-138+PCB-153+PCB-180

<sup>c</sup>N=14 individuals participated twice and N=3 three times over time, thus cell counts sum to >551 and percents sum to >100%.

<sup>d</sup>Only assessed among 79 women with longitudinally collected urine samples (one woman had two sets of samples over time; n=80)

<sup>e</sup>Only assessed among women (N=343 individuals)

<sup>f</sup>Includes hormonal contraceptives and hormone therapy

**Table S3. Adjusted Odds Ratios (aOR) and 95% Confidence Intervals (95% CI) for the association between PBB-153, PCB-118 and  $\Sigma$ PCB (ng/g lipid) and thyroid disease among Michigan females, 2004-2015.**

| Exposure                                                                  | All Thyroid Disease <sup>a</sup> |                    |      |              | Hypothyroidism     |      |               |
|---------------------------------------------------------------------------|----------------------------------|--------------------|------|--------------|--------------------|------|---------------|
|                                                                           | Total <sup>b</sup>               | N (%) <sup>c</sup> | aOR  | 95% CI       | N (%) <sup>d</sup> | aOR  | 95% CI        |
| <b>PBB-153</b>                                                            |                                  |                    |      |              |                    |      |               |
| PBB-153 ln-transformed ( $\Delta$ IQR=56.7 ng/g lipid) <sup>e,f</sup>     | 447                              | 105 (23.5)         | 1.19 | (0.88, 1.59) | 49 (11.8)          | 1.42 | (0.92, 2.18)  |
| PBB-153 Q1 (<LOD- $\leq$ 4.6 ng/g lipid)                                  | 97                               | 10 (10.3)          | 1.00 | reference    | 7 (7.2)            | 1.00 | reference     |
| PBB-153 Q2 (>4.6- $\leq$ 22.7 ng/g lipid)                                 | 93                               | 23 (24.7)          | 2.01 | (0.80, 5.04) | 10 (11.6)          | 1.56 | (0.51, 4.77)  |
| PBB-153 Q3 (>22.7- $\leq$ 44.2 ng/g lipid)                                | 93                               | 24 (25.8)          | 1.93 | (0.73, 5.10) | 6 (7.2)            | 0.85 | (0.23, 3.09)  |
| PBB-153 Q4 (>44.2- $\leq$ 82.4 ng/g lipid)                                | 90                               | 31 (34.4)          | 3.21 | (1.24, 8.36) | 14 (17.5)          | 3.01 | (0.97, 9.40)  |
| PBB-153 Q5 (>82.4- $\leq$ 22504.5 (maximum) ng/g lipid)                   | 85                               | 20 (23.5)          | 2.22 | (0.80, 6.16) | 14 (17.5)          | 3.50 | (1.08, 11.33) |
| <b>PCB-118</b>                                                            |                                  |                    |      |              |                    |      |               |
| PCB-118 ln-transformed ( $\Delta$ IQR=12.3 ng/g lipid) <sup>e</sup>       | 378                              | 107 (28.3)         | 1.55 | (1.10, 2.19) | 48 (14.1)          | 1.72 | (1.11, 2.67)  |
| PCB-118 Q1 (<LOD- <3.5 ng/g lipid)                                        | 80                               | 16 (20.0)          | 1.00 | reference    | 10 (13.0)          | 1.00 | reference     |
| PCB-118 Q2 ( $\geq$ 3.5- <6.2 ng/g lipid),                                | 78                               | 14 (17.9)          | 0.69 | (0.29, 1.60) | 8 (10.7)           | 0.64 | (0.22, 1.83)  |
| PCB-118 Q3 ( $\geq$ 6.2- <10.8 ng/g lipid)                                | 79                               | 20 (25.3)          | 1.02 | (0.46, 2.24) | 7 (9.5)            | 0.46 | (0.16, 1.32)  |
| PCB-118 Q4 ( $\geq$ 10.8- <18.3 ng/g lipid)                               | 79                               | 24 (30.4)          | 1.19 | (0.56, 2.53) | 12 (16.9)          | 1.05 | (0.44, 2.47)  |
| PCB-118 Q5 ( $\geq$ 18.3- < 199.9 (maximum) ng/g lipid)                   | 76                               | 36 (47.4)          | 2.02 | (0.93, 4.43) | 14 (23.7)          | 2.36 | (0.91, 6.13)  |
| <b><math>\Sigma</math>PCB (di-ortho)<sup>g</sup></b>                      |                                  |                    |      |              |                    |      |               |
| $\Sigma$ PCB ln-transformed ( $\Delta$ IQR=102.5 ng/g lipid) <sup>e</sup> | 455                              | 113 (24.8)         | 1.36 | (0.95, 1.94) | 52 (12.4)          | 1.68 | (1.06, 2.64)  |
| $\Sigma$ PCB Q1 ( $\geq$ 3.7- <28.5 ng/g lipid)                           | 96                               | 17 (17.7)          | 1.00 | reference    | 11 (11.5)          | 1.00 | reference     |
| $\Sigma$ PCB Q2 ( $\geq$ 28.5- <56.4 ng/g lipid)                          | 94                               | 17 (18.1)          | 0.72 | (0.32, 1.65) | 6 (6.8)            | 0.43 | (0.14, 1.31)  |
| $\Sigma$ PCB Q3 ( $\geq$ 56.4- <91.5 ng/g lipid)                          | 96                               | 18 (18.8)          | 0.56 | (0.24, 1.30) | 9 (9.9)            | 0.57 | (0.21, 1.50)  |
| $\Sigma$ PCB Q4 ( $\geq$ 91.5- <162.8 ng/g lipid)                         | 98                               | 27 (27.6)          | 0.79 | (0.36, 1.74) | 12 (13.6)          | 0.81 | (0.35, 1.90)  |
| $\Sigma$ PCB Q5 ( $\geq$ 162.8- < 1466.2 (maximum) ng/g lipid)            | 93                               | 37 (39.8)          | 1.28 | (0.59, 2.77) | 17 (21.8)          | 1.81 | (0.78, 4.21)  |

Abbreviations: aOR: adjusted odds ratio; 95% CI: 95% Confidence Interval; IQR=interquartile range; Q1-5: quartile 1-5; LOD: limit of detection

Models for PBB-153 and  $\Sigma$ PCB (di-ortho) control for age, study phase, and smoking status; models for PCB-118 do not control for study phase because all samples from Phase 1 were not reportable due to instrumentation error. Information on individual PCB congeners (PCB-138, 153, and 180) are shown in the Supplemental Material, Tables S4 and S5.

<sup>a</sup>Includes those who specified physician-diagnosed thyroid disease (N=107) and those who had thyroid hormone concentrations outside clinically normal ranges (N=6); includes 10 hyperthyroid, 52 hypothyroid, 14 other types and 37 type not specified.

<sup>b</sup> PBB-153 analyses excludes 8 women who were diagnosed with thyroid disease before the contamination event; PCB-118 analyses exclude 88 women (89 samples) that had missing values due to unstable retention time on laboratory instrument;  $\Sigma$ PCB (di-ortho) analyses include all observations.

<sup>c</sup> 30 women participated multiple times so cell counts may not sum to total and percents may sum to >100%

<sup>d</sup> Hypothyroidism analyses exclude 37 observations due to lack of information on thyroid disease type (32 in PBB-153 model); these are excluded from denominator of percent calculations.

<sup>e</sup>All IQRs and quintiles calculated among women only

<sup>f</sup>PBB-153 concentrations below the LOD were imputed using a distribution-based multiple imputation approach

<sup>g</sup>PCB-138+PCB-153+PCB-180



**Table S4. Adjusted Odds Ratios<sup>a</sup> (aOR) and 95% Confidence Intervals (95% CI) for the association between PCB-138, PCB-153, and PCB-180 (ng/ml) and thyroid disease among Michigan females, 2004-2015.**

| Exposure                                                       | All Thyroid Disease <sup>b</sup> |                    |      |              | Hypothyroidism     |      |              |
|----------------------------------------------------------------|----------------------------------|--------------------|------|--------------|--------------------|------|--------------|
|                                                                | Total                            | N (%) <sup>c</sup> | aOR  | 95% CI       | N (%) <sup>d</sup> | aOR  | 95% CI       |
| <b>PCB-138</b>                                                 |                                  |                    |      |              |                    |      |              |
| PCB-138 ln-transformed ( $\Delta$ IQR=0.27 ng/ml) <sup>c</sup> | 455                              | 113 (24.8)         | 1.11 | (0.77, 1.61) | 52 (12.4)          | 1.44 | (0.90, 2.32) |
| PCB-138 Q1 (0.01- <0.06 ng/ml)                                 | 94                               | 16 (17.0)          | 1.00 | reference    | 11 (11.7)          | 1.00 | reference    |
| PCB-138 Q2 (0.06- <0.13 ng/ml)                                 | 94                               | 16 (17.0)          | 0.80 | (0.34, 1.88) | 4 (4.4)            | 0.26 | (0.07, 1.00) |
| PCB-138 Q3 (0.13- <0.24 ng/ml)                                 | 97                               | 24 (24.7)          | 0.90 | (0.41, 2.01) | 13 (14.6)          | 0.87 | (0.35, 2.19) |
| PCB-138 Q4 (0.24- <0.40 ng/ml)                                 | 97                               | 30 (30.9)          | 1.16 | (0.53, 2.52) | 14 (16.5)          | 1.11 | (0.46, 2.72) |
| PCB-138 Q5 (0.40- <2.58 (maximum) ng/ml)                       | 96                               | 32 (33.3)          | 1.05 | (0.49, 2.26) | 13 (15.7)          | 1.05 | (0.42, 2.65) |
| <b>PCB-153</b>                                                 |                                  |                    |      |              |                    |      |              |
| PCB-153 ln-transformed ( $\Delta$ IQR=0.27 ng/ml) <sup>c</sup> | 455                              | 113 (24.8)         | 1.11 | (0.75, 1.64) | 52 (12.4)          | 1.42 | (0.86, 2.34) |
| PCB-153 Q1 (0.01- <0.07 ng/ml)                                 | 97                               | 16 (16.5)          | 1.00 | reference    | 11 (11.3)          | 1.00 | reference    |
| PCB-153 Q2 (0.07- <0.16 ng/ml)                                 | 92                               | 17 (18.5)          | 0.78 | (0.34, 1.81) | 5 (5.7)            | 0.29 | (0.09, 1.02) |
| PCB-153 Q3 (0.16- <0.26 ng/ml)                                 | 95                               | 22 (23.2)          | 0.84 | (0.37, 1.92) | 13 (14.8)          | 0.86 | (0.34, 2.19) |
| PCB-153 Q4 (0.26- <0.43 ng/ml)                                 | 97                               | 29 (29.9)          | 0.98 | (0.43, 2.21) | 12 (13.9)          | 0.70 | (0.28, 1.77) |
| PCB-153 Q5 (0.43- <1.97 (maximum) ng/ml)                       | 95                               | 35 (36.8)          | 1.07 | (0.48, 2.37) | 15 (18.8)          | 1.13 | (0.45, 2.85) |
| <b>PCB-180</b>                                                 |                                  |                    |      |              |                    |      |              |
| PCB-180 ln-transformed ( $\Delta$ IQR=0.19 ng/ml) <sup>c</sup> | 455                              | 113 (24.8)         | 1.23 | (0.83, 1.84) | 52 (12.4)          | 1.58 | (0.93, 2.68) |
| PCB-180 Q1 (0.01- <0.05 ng/ml)                                 | 96                               | 16 (16.7)          | 1.00 | reference    | 10 (10.9)          | 1.00 | reference    |
| PCB-180 Q2 (0.05- <0.10 ng/ml)                                 | 94                               | 15 (16.0)          | 0.87 | (0.37, 2.03) | 5 (5.2)            | 0.50 | (0.14, 1.77) |
| PCB-180 Q3 (0.10- <0.17 ng/ml)                                 | 97                               | 26 (26.8)          | 1.19 | (0.55, 2.61) | 15 (16.7)          | 1.37 | (0.56, 3.40) |
| PCB-180 Q4 (0.17- <0.28 ng/ml)                                 | 96                               | 25 (26.0)          | 0.82 | (0.36, 1.87) | 9 (10.3)           | 0.62 | (0.23, 1.67) |
| PCB-180 Q5 (0.28- <1.40 (maximum) ng/ml)                       | 95                               | 36 (37.9)          | 1.52 | (0.67, 3.41) | 16 (21.3)          | 2.11 | (0.80, 5.56) |

Abbreviations: aOR: adjusted odds ratio; 95% CI: 95% Confidence Interval; IQR=interquartile range; Q1-5: quartile 1-5.

<sup>a</sup> All models control for lipids, age, study phase, and smoking status.

<sup>b</sup> Includes those who specified physician-diagnosed thyroid disease (N=107) and those who had thyroid hormone concentrations outside clinically normal ranges (N=6); includes 10 hyperthyroid, 52 hypothyroid, 14 other types and 37 type not specified.

<sup>c</sup> 30 women participated multiple times so cell counts may not sum to total and percents may sum to >100%

<sup>d</sup> Hypothyroidism analyses exclude 37 observations due to lack of information on thyroid disease type; these are excluded from denominator of percent calculations.

<sup>e</sup> All IQRs and quintiles calculated among women only

**Table S5. Adjusted Odds Ratios<sup>a</sup> (aOR) and 95% Confidence Intervals (95% CI) for the association between PCB-138, PCB-153, and PCB-180 (ng/g lipid) and thyroid disease among Michigan females, 2004-2015.**

| Exposure                                                             | All Thyroid Disease <sup>b</sup> |                    |      |              | Hypothyroidism     |      |              |
|----------------------------------------------------------------------|----------------------------------|--------------------|------|--------------|--------------------|------|--------------|
|                                                                      | Total                            | N (%) <sup>c</sup> | aOR  | 95% CI       | N (%) <sup>d</sup> | aOR  | 95% CI       |
| <b>PCB-138</b>                                                       |                                  |                    |      |              |                    |      |              |
| PCB-138 ln-transformed ( $\Delta$ IQR= 36.9 ng/g lipid) <sup>c</sup> | 455                              | 113 (24.8)         | 1.32 | (0.94, 1.85) | 52 (12.4)          | 1.67 | (1.06, 2.62) |
| PCB-138 Q1 ( $\geq$ 1.3- <10.0 ng/g lipid)                           | 98                               | 16 (16.3)          | 1.00 | reference    | 9 (9.4)            | 1.00 | reference    |
| PCB-138 Q2 ( $\geq$ 10.0- <19.4 ng/g lipid)                          | 92                               | 19 (20.7)          | 1.02 | (0.44,2.36)  | 8 (9.3)            | 0.84 | (0.29, 2.43) |
| PCB-138 Q3 ( $\geq$ 19.4- <31.7 ng/g lipid)                          | 97                               | 19 (19.6)          | 0.69 | (0.31, 1.52) | 11 (11.7)          | 0.85 | (0.35, 2.09) |
| PCB-138 Q4 ( $\geq$ 31.7- <56.9 ng/g lipid)                          | 96                               | 27 (28.1)          | 1.05 | (0.48, 2.30) | 10 (12.0)          | 0.98 | (0.38, 2.54) |
| PCB-138 Q5 ( $\geq$ 56.9- <635.8 (maximum) ng/g lipid)               | 94                               | 36 (38.3)          | 1.47 | (0.70, 3.08) | 17 (21.0)          | 2.13 | (0.92, 4.92) |
| <b>PCB-153</b>                                                       |                                  |                    |      |              |                    |      |              |
| PCB-153 ln-transformed ( $\Delta$ IQR= 39.9 ng/g lipid) <sup>c</sup> | 455                              | 113 (24.8)         | 1.34 | (0.93, 1.93) | 52 (12.4)          | 1.69 | (1.04, 2.72) |
| PCB-153 Q1 ( $\geq$ 1.6- <11.0 ng/g lipid)                           | 97                               | 17 (17.5)          | 1.00 | reference    | 11 (11.5)          | 1.00 | reference    |
| PCB-153 Q2 ( $\geq$ 11.0- <21.3 ng/g lipid)                          | 96                               | 19 (19.8)          | 0.75 | (0.33, 1.70) | 6 (6.7)            | 0.41 | (0.13, 1.27) |
| PCB-153 Q3 ( $\geq$ 21.3- <35.1 ng/g lipid)                          | 94                               | 15 (16.0)          | 0.49 | (0.21, 1.13) | 8 (18.8)           | 0.47 | (0.17, 1.26) |
| PCB-153 Q4 ( $\geq$ 35.1- <61.8 ng/g lipid)                          | 99                               | 28 (28.3)          | 0.80 | (0.37, 1.74) | 13 (14.9)          | 0.84 | (0.36, 1.97) |
| PCB-153 Q5 ( $\geq$ 61.8- <486.4 (maximum) ng/g lipid)               | 92                               | 38 (41.3)          | 1.32 | (0.61, 2.83) | 17 (21.8)          | 1.69 | (0.72, 3.97) |
| <b>PCB-180</b>                                                       |                                  |                    |      |              |                    |      |              |
| PCB-180 ln-transformed ( $\Delta$ IQR= 25.5 ng/g lipid) <sup>c</sup> | 455                              | 113 (24.8)         | 1.47 | (1.01, 2.13) | 52 (12.4)          | 1.84 | (1.10, 3.05) |
| PCB-180 Q1 ( $\geq$ 0.62- <7.6 ng/g lipid)                           | 97                               | 17 (17.5)          | 1.00 | reference    | 11 (11.5)          | 1.00 | reference    |
| PCB-180 Q2 ( $\geq$ 7.6- <15.3 ng/g lipid)                           | 95                               | 18 (18.9)          | 0.73 | (0.33, 1.63) | 6 (6.7)            | 0.43 | (0.14, 1.27) |
| PCB-180 Q3 ( $\geq$ 15.3- <24.6 ng/g lipid)                          | 94                               | 15 (16.0)          | 0.43 | (0.18, 1.03) | 9 (9.9)            | 0.49 | (0.18, 1.29) |
| PCB-180 Q4 ( $\geq$ 24.6- <40.1 ng/g lipid)                          | 98                               | 25 (25.5)          | 0.70 | (0.31, 1.58) | 12 (13.3)          | 0.79 | (0.33, 1.92) |
| PCB-180 Q5 ( $\geq$ 40.1- <344.1 (maximum) ng/g lipid)               | 91                               | 41 (45.1)          | 1.38 | (0.61, 3.08) | 16 (22.2)          | 1.85 | (0.74, 4.63) |

Abbreviations: aOR: adjusted odds ratio; 95% CI: 95% Confidence Interval; IQR=interquartile range; Q1-5: quartile 1-5.

<sup>a</sup> All models control for age, study phase, and smoking status.

<sup>b</sup> Includes those who specified physician-diagnosed thyroid disease (N=107) and those who had thyroid hormone concentrations outside clinically normal ranges (N=6); includes 10 hyperthyroid, 52 hypothyroid, 14 other types and 37 type not specified

<sup>c</sup> 30 women participated multiple times so cell counts may not sum to total and percents may sum to >100%

<sup>d</sup> Hypothyroidism analyses exclude 37 observations due to lack of information on thyroid disease type; these are excluded from denominator of percent calculations.

<sup>e</sup> All IQRs and quintiles calculated among women only

**Table S6. Thyroid hormone levels by population characteristics in Michigan adults without thyroid disease, 2004-2015 (n=551 individuals, n=571 samples)**

|                                                  | Study sample N (%) | TSH ( $\mu$ IU/mL) (GM (GSD)) | Total T4 ( $\mu$ g/dL) (Mean (SE)) | Total T <sub>3</sub> (ng/dL) (Mean (SE)) | Free T <sub>4</sub> (ng/dL) (Mean (SE)) | Free T <sub>3</sub> (pg/mL) (Mean (SE)) |
|--------------------------------------------------|--------------------|-------------------------------|------------------------------------|------------------------------------------|-----------------------------------------|-----------------------------------------|
| Sex                                              |                    |                               |                                    |                                          |                                         |                                         |
| Female                                           | 343 (62.3)         | 1.53 (0.04)                   | 9.21 <sup>#</sup> (0.08)           | 109.3* (1.3)                             | 0.78 (0.01)                             | 3.21 (0.02)                             |
| Male                                             | 208 (37.7)         | 1.62 (0.06)                   | 8.88 (0.11)                        | 102.0 (1.7)                              | 0.80 (0.01)                             | 3.26 (0.03)                             |
| Age at blood draw <sup>a</sup>                   |                    |                               |                                    |                                          |                                         |                                         |
| 18-29                                            | 62 (11.3)          | 1.41 (0.10)                   | 9.23 (0.22)                        | 120.2* (4.3)                             | 0.83 <sup>#</sup> (0.04)                | 3.24* (0.07)                            |
| 30-39                                            | 126 (22.9)         | 1.62 (0.07)                   | 9.31 (0.14)                        | 113.4 (2.0)                              | 0.77 (0.01)                             | 3.37 (0.04)                             |
| 40-49                                            | 118 (21.4)         | 1.56 (0.07)                   | 8.89 (0.13)                        | 104.4 (2.1)                              | 0.77 (0.01)                             | 3.24 (0.04)                             |
| 50-59                                            | 117 (21.2)         | 1.53 (0.08)                   | 9.03 (0.15)                        | 103.0 (1.8)                              | 0.78 (0.01)                             | 3.18 (0.04)                             |
| $\geq$ 60                                        | 135 (24.5)         | 1.62 (0.07)                   | 9.05 (0.13)                        | 99.1 (2.1)                               | 0.81 (0.01)                             | 3.13 (0.04)                             |
| Age at PBB contamination                         |                    |                               |                                    |                                          |                                         |                                         |
| $\geq$ 16 years at contamination                 | 167 (30.3)         | 1.59 (0.07)                   | 9.05 (0.12)                        | 99.1* (1.8)                              | 0.81 <sup>#</sup> (0.01)                | 3.12* (0.04)                            |
| 0-15 years at contamination                      | 254 (46.1)         | 1.60 (0.05)                   | 9.11 (0.09)                        | 109.1 (1.37)                             | 0.77 (0.01)                             | 3.31 (0.03)                             |
| Born after contamination                         | 130 (23.6)         | 1.47 (0.06)                   | 9.10 (0.15)                        | 111.3 (2.5)                              | 0.80 (0.02)                             | 3.21 (0.04)                             |
| Study years <sup>a</sup>                         |                    |                               |                                    |                                          |                                         |                                         |
| 2004-2005                                        | 74 (13.4)          | 1.64 (0.11)                   | 9.66* (0.16)                       | 126.0* (2.2)                             | 0.76 <sup>#</sup> (0.01)                | 3.59* (0.05)                            |
| 2012-2015                                        | 483 (87.7)         | 1.55 (0.04)                   | 9.00 (0.07)                        | 103.8 (1.1)                              | 0.79 (0.01)                             | 3.18 (0.02)                             |
| Time of blood collection <sup>a</sup>            |                    |                               |                                    |                                          |                                         |                                         |
| 7:00am-10:30am                                   | 90 (16.4)          | 1.78 <sup>#</sup> (0.08)      | 9.16 (0.16)                        | 108.7 (2.4)                              | 0.79 (0.01)                             | 3.31 (0.05)                             |
| 10:30am-3:00pm                                   | 288 (52.4)         | 1.50 (0.05)                   | 9.16 (0.09)                        | 108.0 (1.6)                              | 0.79 (0.01)                             | 3.23 (0.03)                             |
| 3:00pm-8:00pm                                    | 182 (33.1)         | 1.56 (0.06)                   | 8.94 (0.12)                        | 103.5 (1.7)                              | 0.78 (0.01)                             | 3.19 (0.03)                             |
| Missing                                          | 1                  |                               |                                    |                                          |                                         |                                         |
| Body mass index <sup>a</sup>                     |                    |                               |                                    |                                          |                                         |                                         |
| $\leq$ Normal                                    | 125 (34.1)         | 1.51 (0.07)                   | 9.09 (0.14)                        | 111.4 (2.4)                              | 0.79 (0.02)                             | 3.29 (0.04)                             |
| Overweight                                       | 117 (31.9)         | 1.57 (0.07)                   | 8.99 (0.15)                        | 106.5 (2.3)                              | 0.77 (0.01)                             | 3.25 (0.04)                             |
| Obese                                            | 128 (34.9)         | 1.54 (0.07)                   | 9.32 (0.12)                        | 110.9 (2.0)                              | 0.79 (0.01)                             | 3.29 (0.04)                             |
| Missing                                          | 184                |                               |                                    |                                          |                                         |                                         |
| Smoking status                                   |                    |                               |                                    |                                          |                                         |                                         |
| Current smokers                                  | 80 (14.7)          | 1.44 (0.08)                   | 9.19 (0.18)                        | 106.6 <sup>†</sup> (2.6)                 | 0.82 (0.03)                             | 3.20 <sup>†</sup> (0.05)                |
| Former smokers                                   | 137 (25.2)         | 1.52 (0.07)                   | 9.15 (0.13)                        | 102.4 (2.1)                              | 0.79 (0.01)                             | 3.17 (0.04)                             |
| Never smokers                                    | 327 (60.1)         | 1.61 (0.05)                   | 9.05 (0.08)                        | 108.4 (1.3)                              | 0.78 (0.01)                             | 3.26 (0.03)                             |
| Missing                                          | 7                  |                               |                                    |                                          |                                         |                                         |
| Iodine status <sup>b</sup>                       |                    |                               |                                    |                                          |                                         |                                         |
| < 100 $\mu$ g/g creatinine                       | 14 (17.7)          | 1.71 (0.27)                   | 9.25 (0.33)                        | 106.4 (4.91)                             | 0.75 (0.04)                             | 3.43 (0.16)                             |
| $\geq$ 100 $\mu$ g/g creatinine                  | 65 (82.3)          | 1.46 (0.11)                   | 8.83 (0.15)                        | 107.5 (2.4)                              | 0.77 (0.01)                             | 3.28 (0.05)                             |
| < 150 $\mu$ g/g creatinine                       | 43 (54.4)          | 1.55 (0.14)                   | 8.87 (0.22)                        | 106.9 (3.2)                              | 0.76 (0.02)                             | 3.31 (0.08)                             |
| $\geq$ 150 $\mu$ g/g creatinine                  | 37 (46.8)          | 1.44 (0.15)                   | 8.94 (0.17)                        | 107.7 (2.9)                              | 0.77 (0.01)                             | 3.29 (0.07)                             |
| Pregnancy status <sup>a,c</sup>                  |                    |                               |                                    |                                          |                                         |                                         |
| Pregnant                                         | 5 (1.5)            | 1.99 (0.44)                   | 10.10 (0.81)                       | 121.6 (11.9)                             | 0.72 (0.06)                             | 2.86 <sup>†</sup> (0.12)                |
| Not Pregnant                                     | 323 (98.8)         | 1.51 (0.04)                   | 9.19 (0.08)                        | 109.7 (1.4)                              | 0.78 (0.01)                             | 3.23 (0.02)                             |
| Missing                                          | 16                 |                               |                                    |                                          |                                         |                                         |
| Menopausal status <sup>c</sup>                   |                    |                               |                                    |                                          |                                         |                                         |
| Postmenopausal                                   | 39 (14.6)          | 1.57 (0.13)                   | 9.18 (0.25)                        | 103.7 <sup>#</sup> (3.1)                 | 0.81 (0.02)                             | 3.09* (0.05)                            |
| Premenopausal                                    | 228 (85.4)         | 1.48 (0.05)                   | 9.23 (0.10)                        | 112.8 (1.7)                              | 0.78 (0.01)                             | 3.29 (0.03)                             |
| Missing                                          | 76                 |                               |                                    |                                          |                                         |                                         |
| Current hormonal medication use <sup>a,c,d</sup> |                    |                               |                                    |                                          |                                         |                                         |
| Yes                                              | 74 (27.9)          | 1.44 (0.08)                   | 9.95* (0.20)                       | 124.3* (3.5)                             | 0.82 (0.03)                             | 3.31 (0.05)                             |
| No                                               | 194 (73.2)         | 1.51 (0.06)                   | 8.95 (0.10)                        | 106.6 (1.5)                              | 0.77 (0.01)                             | 3.24 (0.03)                             |
| Missing                                          | 78                 |                               |                                    |                                          |                                         |                                         |

Abbreviations: GM: Geometric mean; GSD: geometric standard deviation; SE: standard error; TSH: thyroid-stimulating hormone; T4: thyroxine; T3: triiodothyronine

\*P<0.01; <sup>#</sup>P<0.05; <sup>†</sup>P<0.10; P-values computed using t-tests or ANOVA for comparison between categories (TSH log-transformed in all statistical tests).

<sup>a</sup>N=14 individuals participated twice and N=3 three times over time, thus cell counts sum to >551 and percents sum to >100%.

<sup>b</sup>Only assessed among 79 women with longitudinally collected urine samples (one woman had two sets of samples over time; n=80 sets of observations)

<sup>c</sup>Only assessed among women (N=343 individuals)

<sup>d</sup>Includes hormonal contraceptives and hormone therapy

**Table S7.  $\beta$ -Coefficients and 95% confidence intervals (95% CI) from regression models<sup>a</sup> for associations of ln-transformed PBB and PCB congeners (ng/g lipid) with thyroid-stimulating hormone (TSH)<sup>b</sup> and other thyroid hormones<sup>c</sup> among Michigan adults without thyroid disease (N=571 samples, 551 individuals), 2004-2015**

| Exposure                                | ln TSH ( $\mu$ U/mL)      |                         | Total T <sub>4</sub> ( $\mu$ g/dL) |                         | Total T <sub>3</sub> (ng/dL) |                         | Free T <sub>4</sub> (ng/dL) |                         | Free T <sub>3</sub> (pg/mL) |                         |
|-----------------------------------------|---------------------------|-------------------------|------------------------------------|-------------------------|------------------------------|-------------------------|-----------------------------|-------------------------|-----------------------------|-------------------------|
|                                         | Women<br>$\beta$ (95% CI) | Men<br>$\beta$ (95% CI) | Women<br>$\beta$ (95% CI)          | Men<br>$\beta$ (95% CI) | Women<br>$\beta$ (95% CI)    | Men<br>$\beta$ (95% CI) | Women<br>$\beta$ (95% CI)   | Men<br>$\beta$ (95% CI) | Women<br>$\beta$ (95% CI)   | Men<br>$\beta$ (95% CI) |
| PBB-153 <sup>d</sup>                    | 0.00 (-0.03, 0.03)        | -0.02 (-0.07, 0.04)     | 0.04 (-0.05, 0.12)                 | 0.01 (-0.15, 0.18)      | 1.35 (0.06, 2.63)            | 0.47 (-1.98, 2.92)      | 0.00 (-0.01, 0.00)          | 0.00 (-0.01, 0.02)      | 0.05 (0.03, 0.07)           | 0.01 (-0.04, 0.06)      |
| PCB-118                                 | 0.02 (-0.04, 0.08)        | -0.04 (-0.13, 0.06)     | 0.28 (0.09, 0.47)                  | -0.08 (-0.35, 0.19)     | 5.05 (2.14, 7.95)            | 3.94 (-0.10, 7.99)      | 0.02 (0.01, 0.04)           | 0.00 (-0.02, 0.02)      | 0.05 (0.01, 0.09)           | 0.09 (0.00, 0.17)       |
| PCB-138                                 | -0.01 (-0.07, 0.05)       | -0.02 (-0.11, 0.07)     | 0.18 (0.00, 0.36)                  | -0.06 (-0.31, 0.20)     | 4.01 (0.82, 7.2)             | 4.23 (0.46, 8.01)       | 0.03 (0.02, 0.04)           | 0.01 (-0.01, 0.03)      | 0.03 (-0.02, 0.07)          | 0.06 (-0.01, 0.14)      |
| PCB-153                                 | -0.02 (-0.08, 0.05)       | -0.03 (-0.13, 0.06)     | 0.19 (-0.01, 0.38)                 | -0.04 (-0.32, 0.24)     | 4.65 (1.28, 8.02)            | 4.65 (0.56, 8.75)       | 0.03 (0.02, 0.04)           | 0.01 (-0.01, 0.03)      | 0.03 (-0.02, 0.09)          | 0.08 (0.00, 0.17)       |
| PCB-180                                 | -0.02 (-0.09, 0.04)       | 0.00 (-0.11, 0.10)      | 0.16 (-0.03, 0.36)                 | -0.02 (-0.32, 0.29)     | 4.11 (0.74, 7.49)            | 5.28 (0.77, 9.78)       | 0.03 (0.01, 0.04)           | 0.00 (-0.02, 0.03)      | 0.04 (-0.01, 0.10)          | 0.09 (0.00, 0.19)       |
| $\Sigma$ PCB<br>(di-ortho) <sup>e</sup> | -0.02 (-0.08, 0.05)       | -0.02 (-0.12, 0.08)     | 0.18 (-0.01, 0.38)                 | -0.04 (-0.33, 0.24)     | 4.42 (1.03, 7.81)            | 5.08 (0.90, 9.26)       | 0.04 (0.02, 0.06)           | 0.01 (-0.02, 0.03)      | 0.03 (-0.02, 0.08)          | 0.09 (0.00, 0.18)       |

Abbreviations: TSH: thyroid-stimulating hormone; T4: thyroxine; T3: triiodothyronine; 95% CI: 95% Confidence Interval.

<sup>a</sup>Models control for age at blood draw (indicator variables for each decade), time of blood collection (indicator variables for morning, midday, afternoon/evening), current smoking status (yes/no).

<sup>b</sup>TSH is ln-transformed and thus  $\beta$ -coefficients should be interpreted as follows: a log-unit increase in a given congener is associated with a multiplicative change in TSH of  $e^\beta$ . In terms of changes in PBB and PCB levels (not logged), a p% change in a given congener is associated with a multiplicative change in TSH of  $e^{\beta \cdot [\log(100+p)/100]}$ .

<sup>c</sup>Other thyroid hormones are not transformed and thus  $\beta$ -coefficients should be interpreted as follows: a log-unit increase in a given PBB or PCB congener is associated with an additive change in each hormone of  $\beta$ . In terms of changes in PBB and PCB levels (not logged), a p% change in a given congener is associated with an additive change in each hormone of  $\beta \cdot [\log(100+p)/100]$ .

<sup>d</sup>PBB-153 measures below the LOD were multiply imputed (n=10) based on a lognormal probability distribution whose parameters were determined by maximum likelihood estimation.

<sup>e</sup>PCB-138+PCB-153+PCB-180

**Table S8. Distribution of thyroid hormones among Michigan women and men without thyroid disease, 2004-2015**

| Hormone                                   | Women (n=343)   |        |                 |         |                   | Men (n=208)     |        |                 |         |                   | Coefficient of variation (%) <sup>b</sup> |        |      |
|-------------------------------------------|-----------------|--------|-----------------|---------|-------------------|-----------------|--------|-----------------|---------|-------------------|-------------------------------------------|--------|------|
|                                           | 25th percentile | Median | 75th percentile | Maximum | Mean <sup>a</sup> | 25th percentile | Median | 75th percentile | Maximum | Mean <sup>a</sup> | Low                                       | Medium | High |
| TSH (μIU/mL)                              | 1.1             | 1.5    | 2.1             | 7.6     | 1.5               | 1.1             | 1.7    | 2.4             | 7.2     | 1.6               | 5.8                                       | 7.4    | 7.3  |
| Total T <sub>4</sub> (μg/dL) <sup>c</sup> | 8.1             | 9.2    | 10.2            | 13.1    | 9.2               | 7.8             | 8.7    | 10.0            | 15.4    | 8.9               | 5.9                                       | 4.7    | 3.2  |
| Total T <sub>3</sub> (ng/dL)              | 92              | 107    | 123             | 211     | 109               | 85              | 100    | 112             | 209     | 102               | 10.2                                      | 5.8    | 6.9  |
| Free T <sub>4</sub> (ng/dL)               | 0.70            | 0.77   | 0.84            | 3.10    | 0.78              | 0.71            | 0.79   | 0.87            | 1.26    | 0.80              | 8.6                                       | 6.8    | 8.0  |
| Free T <sub>3</sub> (pg/mL)               | 2.9             | 3.2    | 3.5             | 5.0     | 3.2               | 2.9             | 3.2    | 3.5             | 5.6     | 3.3               | 4.8                                       | 2.8    | 2.7  |

Abbreviations: TSH: thyroid-stimulating hormone; T4: thyroxine; T3: triiodothyronine

<sup>a</sup> GM reported for TSH; arithmetic means reported for all other hormones

<sup>b</sup> Inter-assay coefficients of variation computed as: [(standard deviation / mean) × 100]

<sup>c</sup> Total T<sub>4</sub> missing for 1 woman

**Table S9.  $\beta$ -Coefficients and 95% confidence intervals (95% CI) from regression models<sup>a</sup> for associations of PBB-153, PCB-118 and  $\Sigma$ PCB (ng/mL) deciles with TSH<sup>b</sup> and other thyroid hormones<sup>c</sup> among women without a history of thyroid disease (N=343 women, 363 samples)**

| Exposure                             | Comparison      | ln TSH ( $\mu$ IU/mL) | Total T <sub>4</sub> ( $\mu$ g/dL) | Total T <sub>3</sub> (ng/dL) | Free T <sub>4</sub> (ng/dL) | Free T <sub>3</sub> (pg/mL) |
|--------------------------------------|-----------------|-----------------------|------------------------------------|------------------------------|-----------------------------|-----------------------------|
|                                      |                 | $\beta$ (95% CI)      | $\beta$ (95% CI)                   | $\beta$ (95% CI)             | $\beta$ (95% CI)            | $\beta$ (95% CI)            |
| PBB-153                              | Decile 2 vs. 1  | 0.01 (-0.24, 0.25)    | 0.03 (-0.81, 0.87)                 | -16.23 (-29.80, -2.67)       | 0.08 (-0.07, 0.23)          | -0.22 (-0.44, 0.01)         |
|                                      | Decile 3 vs. 1  | 0.07 (-0.17, 0.31)    | 0.12 (-0.66, 0.90)                 | -10.46 (-23.38, 2.46)        | 0.02 (-0.04, 0.07)          | 0.00 (-0.19, 0.18)          |
|                                      | Decile 4 vs. 1  | -0.06 (-0.32, 0.20)   | -0.38 (-1.17, 0.40)                | -4.49 (-18.89, 9.91)         | 0.00 (-0.08, 0.07)          | 0.08 (-0.12, 0.29)          |
|                                      | Decile 5 vs. 1  | 0.06 (-0.19, 0.30)    | -0.28 (-1.06, 0.50)                | -4.57 (-19.91, 10.78)        | 0.02 (-0.05, 0.09)          | 0.08 (-0.12, 0.29)          |
|                                      | Decile 6 vs. 1  | -0.18 (-0.45, 0.09)   | -0.09 (-0.89, 0.70)                | -0.14 (-13.85, 13.57)        | 0.01 (-0.06, 0.09)          | 0.21 (-0.01, 0.42)          |
|                                      | Decile 7 vs. 1  | -0.03 (-0.28, 0.22)   | -0.10 (-0.89, 0.70)                | 0.84 (-12.13, 13.81)         | 0.02 (-0.06, 0.09)          | 0.22 (0.00, 0.44)           |
|                                      | Decile 8 vs. 1  | -0.05 (-0.32, 0.22)   | -0.31 (-1.15, 0.52)                | -8.61 (-22.02, 4.80)         | 0.01 (-0.06, 0.08)          | 0.15 (-0.07, 0.37)          |
|                                      | Decile 9 vs. 1  | -0.11 (-0.36, 0.13)   | 0.10 (-0.68, 0.88)                 | 1.67 (-13.20, 16.55)         | 0.03 (-0.04, 0.09)          | 0.08 (-0.13, 0.29)          |
|                                      | Decile 10 vs. 1 | 0.02 (-0.29, 0.33)    | 0.27 (-0.59, 1.12)                 | 6.23 (-7.85, 20.32)          | -0.01 (-0.08, 0.06)         | 0.29 (0.07, 0.51)           |
|                                      | PCB-118         | Decile 2 vs. 1        | 0.01 (-0.26, 0.28)                 | 0.89 (-0.03, 1.80)           | 4.94 (-7.78, 17.66)         | -0.02 (-0.09, 0.06)         |
| Decile 3 vs. 1                       |                 | 0.00 (-0.23, 0.23)    | 0.78 (-0.14, 1.70)                 | 10.68 (-2.09, 23.45)         | 0.03 (-0.03, 0.09)          | 0.11 (-0.06, 0.28)          |
| Decile 4 vs. 1                       |                 | -0.19 (-0.46, 0.08)   | 0.85 (-0.06, 1.75)                 | 7.06 (-5.46, 19.59)          | 0.13 (-0.02, 0.28)          | 0.08 (-0.18, 0.34)          |
| Decile 5 vs. 1                       |                 | -0.12 (-0.39, 0.15)   | 0.64 (-0.21, 1.49)                 | 13.03 (-0.09, 26.15)         | 0.08 (0.02, 0.13)           | 0.11 (-0.04, 0.27)          |
| Decile 6 vs. 1                       |                 | 0.03 (-0.27, 0.32)    | 0.49 (-0.43, 1.41)                 | 12.19 (-1.58, 25.97)         | 0.05 (-0.01, 0.10)          | 0.11 (-0.07, 0.28)          |
| Decile 7 vs. 1                       |                 | -0.02 (-0.27, 0.23)   | 1.10 (0.16, 2.03)                  | 14.63 (1.85, 27.42)          | 0.10 (0.03, 0.17)           | 0.20 (0.01, 0.39)           |
| Decile 8 vs. 1                       |                 | 0.11 (-0.16, 0.38)    | 0.92 (0.05, 1.78)                  | 20.10 (7.31, 32.89)          | 0.07 (0.01, 0.13)           | 0.28 (0.05, 0.51)           |
| Decile 9 vs. 1                       |                 | 0.08 (-0.20, 0.36)    | 0.96 (0.08, 1.84)                  | 10.40 (-1.79, 22.60)         | 0.07 (0.01, 0.13)           | 0.05 (-0.12, 0.21)          |
| Decile 10 vs. 1                      |                 | 0.05 (-0.18, 0.29)    | 1.07 (0.24, 1.90)                  | 17.59 (4.60, 30.58)          | 0.06 (-0.01, 0.13)          | 0.05 (-0.13, 0.22)          |
| $\Sigma$ PCB (di-ortho) <sup>d</sup> |                 | Decile 2 vs. 1        | 0.00 (-0.24, 0.24)                 | 0.10 (-0.73, 0.94)           | 3.42 (-8.56, 15.40)         | 0.03 (-0.03, 0.09)          |
|                                      | Decile 3 vs. 1  | -0.13 (-0.37, 0.12)   | -0.11 (-0.91, 0.68)                | 11.08 (-0.88, 23.04)         | 0.05 (-0.01, 0.12)          | 0.19 (0.00, 0.37)           |
|                                      | Decile 4 vs. 1  | -0.01 (-0.26, 0.25)   | 0.05 (-0.75, 0.85)                 | 7.87 (-3.73, 19.48)          | 0.05 (0.00, 0.11)           | 0.18 (0.00, 0.36)           |
|                                      | Decile 5 vs. 1  | -0.04 (-0.33, 0.25)   | -0.01 (-0.81, 0.79)                | 11.65 (0.22, 23.07)          | 0.04 (-0.01, 0.10)          | 0.13 (-0.06, 0.32)          |
|                                      | Decile 6 vs. 1  | -0.09 (-0.33, 0.15)   | 0.23 (-0.57, 1.03)                 | 14.61 (1.71, 27.52)          | 0.10 (0.04, 0.16)           | 0.16 (-0.03, 0.34)          |
|                                      | Decile 7 vs. 1  | -0.17 (-0.45, 0.11)   | 0.47 (-0.37, 1.31)                 | 8.54 (-4.01, 21.09)          | 0.12 (-0.03, 0.28)          | 0.05 (-0.19, 0.30)          |
|                                      | Decile 8 vs. 1  | -0.07 (-0.34, 0.20)   | 0.50 (-0.35, 1.34)                 | 17.34 (4.44, 30.23)          | 0.09 (0.03, 0.16)           | 0.15 (-0.03, 0.34)          |
|                                      | Decile 9 vs. 1  | 0.02 (-0.23, 0.27)    | 0.00 (-0.82, 0.83)                 | 12.29 (-1.79, 26.37)         | 0.12 (0.06, 0.18)           | 0.12 (-0.09, 0.33)          |
|                                      | Decile 10 vs. 1 | -0.07 (-0.34, 0.20)   | 0.57 (-0.22, 1.36)                 | 11.03 (-1.91, 23.98)         | 0.09 (0.02, 0.16)           | 0.03 (-0.18, 0.23)          |

Abbreviations: TSH: thyroid-stimulating hormone; T4: thyroxine; T3: triiodothyronine; 95% CI: 95% Confidence Interval.

For PBB-153: Decile 1=  $\leq 0.01$ , Decile 2=  $>0.01- \leq 0.03$ , Decile 3=  $>0.03- \leq 0.06$ , Decile 4=  $>0.06- \leq 0.14$ , Decile 5=  $>0.14- \leq 0.21$ , Decile 6=  $>0.21- \leq 0.27$ , Decile 7=  $>0.27- \leq 0.41$ , Decile 8=  $>0.41- \leq 0.63$ , Decile 9=  $>0.63- \leq 1.42$ , Decile 10=  $>1.42$

For PCB-118: Decile 1=  $\leq 0.02$ , Decile 2=  $>0.02- \leq 0.02$ , Decile 3=  $>0.02- \leq 0.03$ , Decile 4=  $>0.03- \leq 0.04$ , Decile 5=  $>0.04- \leq 0.05$ , Decile 6=  $>0.05- \leq 0.07$ , Decile 7=  $>0.07- \leq 0.08$ , Decile 8=  $>0.08- \leq 0.11$ , Decile 9=  $>0.11- \leq 0.15$ , Decile 10=  $>0.15$

For  $\Sigma$ PCB (di-ortho): Decile 1=  $\leq 0.11$ , Decile 2=  $>0.11- \leq 0.18$ , Decile 3=  $>0.18- \leq 0.24$ , Decile 4=  $>0.24- \leq 0.35$ , Decile 5=  $>0.35- \leq 0.46$ , Decile 6=  $>0.46- \leq 0.62$ , Decile 7=  $>0.62- \leq 0.77$ , Decile 8=  $>0.77- \leq 0.98$ , Decile 9=  $>0.98- \leq 1.32$ , Decile 10=  $>1.32$

<sup>a</sup>  $\beta$ -coefficients and 95% CIs are shown graphically in Figure 1. All models adjusted for age, time of blood collection, and smoking status.

<sup>b</sup> TSH is ln-transformed and thus  $\beta$ -coefficients should be interpreted as follows: compared with exposure in decile 1, exposure in other deciles are associated with multiplicative changes in TSH of e <sup>$\beta$</sup>

<sup>c</sup> Other thyroid hormones and parameters are not transformed and thus  $\beta$ -coefficients should be interpreted as follows: compared with exposure in decile 1, exposure in other deciles are associated with additive changes in each hormone of  $\beta$ .

<sup>d</sup> PCB-138+PCB-153+PCB-180

**Table S10.  $\beta$ -Coefficients and 95% confidence intervals (95% CI) from regression models for associations of PBB-153, PCB-118 and  $\Sigma$ PCB (ng/mL) deciles with TSH and other thyroid hormones among men without a history of thyroid disease (N=208)**

| Exposure                             | Comparison      | ln TSH ( $\mu$ IU/mL) | Total T <sub>4</sub> ( $\mu$ g/dL) | Total T <sub>3</sub> (ng/dL) | Free T <sub>4</sub> (ng/dL) | Free T <sub>3</sub> (pg/mL) |
|--------------------------------------|-----------------|-----------------------|------------------------------------|------------------------------|-----------------------------|-----------------------------|
|                                      |                 | $\beta$ (95% CI)      | $\beta$ (95% CI)                   | $\beta$ (95% CI)             | $\beta$ (95% CI)            | $\beta$ (95% CI)            |
| PBB-153                              | Decile 2 vs. 1  | -0.10 (-0.49, 0.29)   | 1.43 (0.30, 2.57)                  | 7.46 (-9.58, 24.50)          | 0.00 (-0.10, 0.09)          | 0.32 (-0.03, 0.67)          |
|                                      | Decile 3 vs. 1  | -0.01 (-0.41, 0.39)   | 0.64 (-0.52, 1.81)                 | 2.23 (-15.24, 19.71)         | 0.00 (-0.09, 0.10)          | 0.03 (-0.33, 0.39)          |
|                                      | Decile 4 vs. 1  | 0.05 (-0.35, 0.45)    | 0.69 (-0.47, 1.85)                 | -0.30 (-17.75, 17.15)        | -0.05 (-0.15, 0.04)         | 0.06 (-0.30, 0.42)          |
|                                      | Decile 5 vs. 1  | -0.11 (-0.51, 0.30)   | 1.20 (0.02, 2.38)                  | 0.27 (-17.37, 17.90)         | 0.02 (-0.08, 0.11)          | 0.18 (-0.18, 0.54)          |
|                                      | Decile 6 vs. 1  | -0.52 (-0.93, -0.12)  | 1.35 (0.16, 2.55)                  | 4.66 (-13.23, 22.56)         | 0.04 (-0.06, 0.13)          | 0.25 (-0.12, 0.62)          |
|                                      | Decile 7 vs. 1  | -0.07(-0.47, 0.33)    | 0.59 (-0.58, 1.77)                 | 2.73 (-14.85, 20.30)         | -0.02 (-0.12, 0.07)         | 0.25 (-0.11, 0.61)          |
|                                      | Decile 8 vs. 1  | -0.28 (-0.68, 0.11)   | 0.93 (-0.21, 2.08)                 | 6.06 (-11.15, 23.26)         | -0.04 (-0.13 0.05)          | 0.19 (-0.17, 0.54)          |
|                                      | Decile 9 vs. 1  | 0.02 (-0.39, 0.42)    | 0.30 (-0.88, 1.48)                 | -2.26 (-19.95, 15.44)        | -0.02 (-0.12, 0.07)         | 0.13 (-0.23, 0.50)          |
|                                      | Decile 10 vs. 1 | -0.16 (-0.56, 0.25)   | 0.85 (-0.34, 2.04)                 | -0.80 (-18.60, 16.99)        | 0.02 (-0.08, 0.12)          | 0.07 (-0.29, 0.44)          |
|                                      | PCB-118         | Decile 2 vs. 1        | -0.17 (-0.51, 0.18)                | -0.06 (-1.04, 0.93)          | -2.06 (-17.13, 13.01)       | 0.03 (-0.05, 0.11)          |
| Decile 3 vs. 1                       |                 | -0.11 (-0.45, 0.22)   | 0.01 (-0.92, 0.95)                 | 0.88 (-13.44, 15.19)         | 0.00 (-0.08, 0.08)          | -0.01 (-0.30, 0.29)         |
| Decile 4 vs. 1                       |                 | -0.16 (-0.51, 0.19)   | -0.70 (-1.69, 0.28)                | 3.97 (-11.12, 19.06)         | -0.04 (-0.12, 0.04)         | 0.11 (-0.20, 0.42)          |
| Decile 5 vs. 1                       |                 | -0.41 (-0.76, -0.05)  | 0.22 (-0.78, 1.22)                 | 7.63 (-7.65, 22.90)          | 0.05 (-0.03, 0.13)          | 0.23 (-0.09, 0.54)          |
| Decile 6 vs. 1                       |                 | -0.34 (-0.67, 0.00)   | 0.15 (-0.81, 1.11)                 | 4.30 (-10.35, 18.95)         | 0.00 (-0.08, 0.08)          | 0.05 (-0.25, 0.35)          |
| Decile 7 vs. 1                       |                 | -0.37 (-0.72, -0.02)  | -0.68 (-1.67, 0.30)                | -0.38 (-15.40, 14.64)        | -0.01 (-0.09, 0.07)         | 0.08 (-0.23, 0.39)          |
| Decile 8 vs. 1                       |                 | -0.22 (-0.57 0.13)    | 0.12 (-0.86, 1.11)                 | 7.07 (-8.02, 22.16)          | 0.03 (-0.05, 0.11)          | 0.04 (-0.28, 0.35)          |
| Decile 9 vs. 1                       |                 | -0.06 (-0.41, 0.29)   | -0.86 (-1.84, 0.13)                | 1.11 (-13.93, 16.16)         | -0.01 (-0.09, 0.07)         | 0.11 (-0.20, 0.42)          |
| Decile 10 vs. 1                      |                 | -0.04 (-0.38, 0.31)   | -0.58 (-1.57, 0.41)                | 0.48 (-14.68, 15.64)         | -0.01 (-0.09, 0.07)         | -0.02 (-0.34, 0.29)         |
| $\Sigma$ PCB (di-ortho) <sup>d</sup> |                 | Decile 2 vs. 1        | -0.03 (-0.37, 0.31)                | 0.63 (-0.35, 1.61)           | 4.12 (-10.33, 18.57)        | 0.04 (-0.04, 0.12)          |
|                                      | Decile 3 vs. 1  | -0.15 (-0.49, 0.19)   | 0.21 (-0.77, 1.20)                 | 4.74 (-9.75, 19.24)          | -0.01 (-0.08, 0.07)         | 0.18 (-0.12, 0.47)          |
|                                      | Decile 4 vs. 1  | 0.07 (-0.31, 0.44)    | -0.27 (-1.36, 0.81)                | 2.64 (-13.28, 18.56)         | -0.03 (-0.12, 0.06)         | 0.15 (-0.18, 0.47)          |
|                                      | Decile 5 vs. 1  | -0.15 (-0.51, 0.21)   | 0.00 (-1.04, 1.03)                 | 3.71 (-11.54, 18.95)         | 0.04 (-0.05, 0.12)          | 0.42 (0.10, 0.73)           |
|                                      | Decile 6 vs. 1  | -0.16 (-0.52, 0.21)   | 0.69 (-0.35, 1.74)                 | 5.25 (-10.14, 20.64)         | 0.03 (-0.05, 0.11)          | 0.17 (-0.14, 0.49)          |
|                                      | Decile 7 vs. 1  | -0.35 (-0.73, 0.02)   | -0.17 (-1.24, 0.91)                | 6.81 (-9.07, 22.68)          | 0.06 (-0.03, 0.14)          | 0.16 (-0.16, 0.49)          |
|                                      | Decile 8 vs. 1  | -0.12 (-0.48, 0.25)   | -0.11 (-1.17, 0.94)                | -0.60 (-16.09, 14.89)        | -0.03 (-0.11, 0.06)         | 0.12 (-0.20, 0.44)          |
|                                      | Decile 9 vs. 1  | -0.13 (-0.51, 0.24)   | 0.08 (-1.01, 1.16)                 | 17.35 (1.35, 33.36)          | 0.03 (-0.06, 0.12)          | 0.39 (0.06, 0.72)           |
|                                      | Decile 10 vs. 1 | 0.12 (-0.24, 0.49)    | -0.54 (-1.60, 0.52)                | 4.15 (-11.44, 19.74)         | -0.01 (-0.09, 0.08)         | 0.11 (-0.21, 0.43)          |

Abbreviations: TSH: thyroid-stimulating hormone; T4: thyroxine; T3: triiodothyronine; 95% CI: 95% Confidence Interval.

For PBB-153: Decile 1= $\leq 0.10$ , Decile 2= $>0.10- \leq 0.19$ , Decile 3= $>0.19- \leq 0.30$ , Decile 4= $>0.30- \leq 0.39$ , Decile 5= $>0.39- \leq 0.47$ , Decile 6= $>0.47- \leq 0.68$ , Decile 7= $>0.68- \leq 0.91$ , Decile 8= $>0.91- \leq 1.41$ , Decile 9= $>1.41- \leq 3.51$ , Decile 10= $3.51$

For PCB-118: Decile 1= $\leq 0.02$ , Decile 2= $>0.02- \leq 0.03$ , Decile 3= $>0.03- \leq 0.04$ , Decile 4= $>0.04- \leq 0.05$ , Decile 5= $>0.05- \leq 0.06$ , Decile 6= $>0.06- \leq 0.07$ , Decile 7= $>0.07- \leq 0.08$ , Decile 8= $>0.08- \leq 0.10$ , Decile 9= $>0.10- \leq 0.16$ , Decile 10= $>0.16$

For  $\Sigma$ PCB (di-ortho): Decile 1= $\leq 0.25$ , Decile 2= $>0.25- \leq 0.37$ , Decile 3= $>0.37- \leq 0.52$ , Decile 4= $>0.52- \leq 0.64$ , Decile 5= $>0.64- \leq 0.78$ , Decile 6= $>0.78- \leq 0.94$ , Decile 7= $>0.94- 1.14$ , Decile 8= $>1.14- \leq 1.45$ , Decile 9= $>1.45- \leq 1.78$ , Decile 10= $>1.78$

<sup>a</sup>  $\beta$ -coefficients and 95% CIs are shown graphically in Figure 1. All models adjusted for age, time of blood collection, and smoking status.

<sup>b</sup> TSH is ln-transformed and thus  $\beta$ -coefficients should be interpreted as follows: compared with exposure in decile 1, exposure in other deciles are associated with multiplicative changes in TSH of  $e^\beta$

<sup>c</sup> Other thyroid hormones and parameters are not transformed and thus  $\beta$ -coefficients should be interpreted as follows: compared with exposure in decile 1, exposure in other deciles are associated with additive changes in each hormone of  $\beta$ .

<sup>d</sup> PCB-138+PCB-153+PCB-180

**Table S11.  $\beta$ -Coefficients and 95% confidence intervals (95% CI) from regression models<sup>a</sup> for associations of PCB-138, 153, and 180 (ng/mL) deciles with TSH<sup>b</sup> and other thyroid hormones<sup>c</sup> among women without a history of thyroid disease (N=343 women, 363 samples)**

| Comparison      |                 | ln TSH ( $\mu$ IU/mL) |        |       | Total T <sub>4</sub> ( $\mu$ g/dL) |        |       | Total T <sub>3</sub> (ng/dL) |        |        | Free T <sub>4</sub> (ng/dL) |        |       | Free T <sub>3</sub> (pg/mL) |        |       |
|-----------------|-----------------|-----------------------|--------|-------|------------------------------------|--------|-------|------------------------------|--------|--------|-----------------------------|--------|-------|-----------------------------|--------|-------|
|                 |                 | $\beta$               | 95% CI |       | $\beta$                            | 95% CI |       | $\beta$                      | 95% CI |        | $\beta$                     | 95% CI |       | $\beta$                     | 95% CI |       |
| PCB-138         | Decile 2 vs. 1  | 0.01                  | -0.24  | 0.26  | -0.04                              | -0.90  | 0.82  | 5.44                         | -6.60  | 17.48  | 0.03                        | -0.02  | 0.09  | 0.20                        | 0.01   | 0.39  |
|                 | Decile 3 vs. 1  | -0.09                 | -0.36  | 0.17  | -0.09                              | -0.82  | 0.65  | 9.43                         | -1.02  | 19.87  | 0.02                        | -0.04  | 0.08  | 0.17                        | 0.00   | 0.34  |
|                 | Decile 4 vs. 1  | 0.08                  | -0.18  | 0.34  | -0.20                              | -0.98  | 0.57  | 12.14                        | -0.07  | 24.35  | 0.02                        | -0.03  | 0.08  | 0.27                        | 0.09   | 0.46  |
|                 | Decile 5 vs. 1  | 0.01                  | -0.26  | 0.28  | 0.17                               | -0.62  | 0.95  | 13.58                        | 2.48   | 24.68  | 0.03                        | -0.03  | 0.08  | 0.26                        | 0.09   | 0.43  |
|                 | Decile 6 vs. 1  | -0.04                 | -0.31  | 0.23  | -0.11                              | -0.91  | 0.69  | 10.36                        | -0.59  | 21.32  | 0.09                        | 0.03   | 0.14  | 0.12                        | -0.05  | 0.30  |
|                 | Decile 7 vs. 1  | 0.00                  | -0.28  | 0.27  | 0.93                               | 0.13   | 1.72  | 17.61                        | 5.17   | 30.06  | 0.07                        | 0.02   | 0.13  | 0.21                        | 0.04   | 0.38  |
|                 | Decile 8 vs. 1  | -0.13                 | -0.38  | 0.12  | -0.09                              | -0.92  | 0.73  | 17.19                        | 5.18   | 29.20  | 0.13                        | -0.02  | 0.28  | 0.11                        | -0.13  | 0.35  |
|                 | Decile 9 vs. 1  | -0.01                 | -0.25  | 0.23  | 0.29                               | -0.50  | 1.08  | 14.62                        | 0.76   | 28.48  | 0.10                        | 0.04   | 0.16  | 0.22                        | 0.01   | 0.42  |
|                 | Decile 10 vs. 1 | 0.00                  | -0.27  | 0.27  | 0.22                               | -0.54  | 0.97  | 9.54                         | -2.13  | 21.20  | 0.09                        | 0.02   | 0.15  | 0.03                        | -0.16  | 0.21  |
|                 | PCB-153         | Decile 2 vs. 1        | -0.06  | -0.30 | 0.18                               | 0.30   | -0.54 | 1.13                         | 0.74   | -11.16 | 12.64                       | 0.04   | -0.01 | 0.10                        | 0.11   | -0.08 |
| Decile 3 vs. 1  |                 | -0.11                 | -0.35  | 0.14  | 0.00                               | -0.76  | 0.76  | 5.81                         | -5.98  | 17.59  | 0.04                        | -0.02  | 0.09  | 0.09                        | -0.08  | 0.26  |
| Decile 4 vs. 1  |                 | -0.07                 | -0.34  | 0.20  | 0.19                               | -0.58  | 0.96  | 6.61                         | -4.74  | 17.97  | 0.04                        | -0.01  | 0.09  | 0.23                        | 0.04   | 0.42  |
| Decile 5 vs. 1  |                 | -0.06                 | -0.34  | 0.21  | 0.25                               | -0.48  | 0.98  | 11.12                        | 0.48   | 21.76  | 0.04                        | 0.00   | 0.09  | 0.20                        | 0.03   | 0.38  |
| Decile 6 vs. 1  |                 | -0.10                 | -0.37  | 0.18  | 0.25                               | -0.56  | 1.07  | 12.18                        | -0.80  | 25.15  | 0.07                        | 0.02   | 0.13  | 0.08                        | -0.10  | 0.26  |
| Decile 7 vs. 1  |                 | -0.24                 | -0.48  | -0.01 | 0.87                               | 0.07   | 1.67  | 8.38                         | -3.70  | 20.45  | 0.15                        | 0.01   | 0.30  | 0.13                        | -0.12  | 0.37  |
| Decile 8 vs. 1  |                 | -0.09                 | -0.35  | 0.16  | 0.33                               | -0.48  | 1.13  | 14.12                        | 1.52   | 26.73  | 0.07                        | 0.02   | 0.13  | 0.15                        | -0.01  | 0.31  |
| Decile 9 vs. 1  |                 | 0.00                  | -0.26  | 0.26  | 0.17                               | -0.64  | 0.98  | 9.33                         | -4.99  | 23.65  | 0.10                        | 0.05   | 0.16  | 0.11                        | -0.11  | 0.32  |
| Decile 10 vs. 1 |                 | -0.09                 | -0.36  | 0.18  | 0.60                               | -0.17  | 1.38  | 10.47                        | -2.08  | 23.01  | 0.09                        | 0.03   | 0.15  | 0.03                        | -0.18  | 0.23  |
| PCB-180         |                 | Decile 2 vs. 1        | -0.18  | -0.41 | 0.05                               | 0.45   | -0.38 | 1.27                         | 0.49   | -12.13 | 13.12                       | 0.05   | -0.01 | 0.11                        | 0.11   | -0.08 |
|                 | Decile 3 vs. 1  | -0.02                 | -0.27  | 0.23  | 0.09                               | -0.71  | 0.89  | 11.49                        | -0.06  | 23.03  | 0.04                        | -0.02  | 0.10  | 0.18                        | -0.01  | 0.36  |
|                 | Decile 4 vs. 1  | -0.06                 | -0.32  | 0.21  | 0.11                               | -0.66  | 0.89  | 8.71                         | -1.94  | 19.36  | 0.06                        | 0.01   | 0.12  | 0.26                        | 0.09   | 0.42  |
|                 | Decile 5 vs. 1  | -0.14                 | -0.41  | 0.13  | 0.11                               | -0.66  | 0.89  | 9.15                         | -2.98  | 21.29  | 0.08                        | 0.02   | 0.13  | 0.08                        | -0.11  | 0.27  |
|                 | Decile 6 vs. 1  | -0.05                 | -0.33  | 0.23  | 0.64                               | -0.15  | 1.44  | 14.38                        | 1.12   | 27.63  | 0.14                        | 0.00   | 0.27  | 0.11                        | -0.12  | 0.34  |
|                 | Decile 7 vs. 1  | -0.21                 | -0.46  | 0.05  | 0.30                               | -0.57  | 1.16  | 9.60                         | -4.19  | 23.38  | 0.08                        | 0.02   | 0.13  | 0.22                        | 0.02   | 0.42  |
|                 | Decile 8 vs. 1  | -0.08                 | -0.36  | 0.20  | 0.26                               | -0.57  | 1.09  | 9.69                         | -3.05  | 22.43  | 0.09                        | 0.03   | 0.15  | 0.09                        | -0.09  | 0.27  |
|                 | Decile 9 vs. 1  | -0.07                 | -0.34  | 0.19  | 0.55                               | -0.26  | 1.36  | 10.38                        | -1.73  | 22.49  | 0.10                        | 0.04   | 0.15  | 0.19                        | -0.01  | 0.39  |
|                 | Decile 10 vs. 1 | -0.10                 | -0.39  | 0.19  | 0.57                               | -0.29  | 1.43  | 11.78                        | -1.52  | 25.08  | 0.10                        | 0.04   | 0.16  | 0.08                        | -0.14  | 0.30  |

Abbreviations: TSH: thyroid-stimulating hormone; T4: thyroxine; T3: triiodothyronine; 95% CI: 95% Confidence Interval.

For PCB-138: Decile 1=  $\leq 0.037$ , Decile 2=  $>0.037- \leq 0.057$ , Decile 3=  $>0.057- \leq 0.085$ , Decile 4=  $>0.085- \leq 0.113$ , Decile 5=  $>0.113- \leq 0.156$ , Decile 6=  $>0.156- \leq 0.212$ , Decile 7=  $>0.212- \leq 0.276$ , Decile 8=  $>0.276- \leq 0.358$ , Decile 9=  $>0.358- \leq 0.521$ , Decile 10=  $>0.521$

For PCB-153: Decile 1=  $\leq 0.042$ , Decile 2=  $>0.042- \leq 0.067$ , Decile 3=  $>0.067- \leq 0.094$ , Decile 4=  $>0.094- \leq 0.128$ , Decile 5=  $>0.128- \leq 0.175$ , Decile 6=  $>0.175- \leq 0.235$ , Decile 7=  $>0.235- \leq 0.293$ , Decile 8=  $>0.293- \leq 0.377$ , Decile 9=  $>0.377- \leq 0.503$ , Decile 10=  $>0.503$

For PCB-180: Decile 1=  $\leq 0.025$ , Decile 2=  $>0.025- \leq 0.046$ , Decile 3=  $>0.046- \leq 0.066$ , Decile 4=  $>0.066- \leq 0.091$ , Decile 5=  $>0.091- \leq 0.116$ , Decile 6=  $>0.116- \leq 0.154$ , Decile 7=  $>0.154- \leq 0.195$ , Decile 8=  $>0.195- \leq 0.250$ , Decile 9=  $>0.250- \leq 0.317$ , Decile 10=  $>0.317$

<sup>a</sup> All models adjusted for age, time of blood collection, and smoking status.

<sup>b</sup> TSH is ln-transformed and thus  $\beta$ -coefficients should be interpreted as follows: compared with exposure in decile 1, exposure in other deciles are associated with multiplicative changes in TSH of  $e^{\beta}$

<sup>c</sup> Other thyroid hormones and parameters are not transformed and thus  $\beta$ -coefficients should be interpreted as follows: compared with exposure in decile 1, exposure in other deciles are associated with additive changes in each hormone of  $\beta$ .



**Table S12.  $\beta$ -Coefficients and 95% confidence intervals (95% CI) from regression models<sup>a</sup> for associations of PCB-138, 153, and 180 (ng/mL) deciles with TSH<sup>b</sup> and other thyroid hormones<sup>c</sup> among men without a history of thyroid disease (N=208)**

| Comparison      |                 | ln TSH ( $\mu$ IU/mL) |        |       | Total T <sub>4</sub> ( $\mu$ g/dL) |        |       | Total T <sub>3</sub> (ng/dL) |        |        | Free T <sub>4</sub> (ng/dL) |        |       | Free T <sub>3</sub> (pg/mL) |        |       |
|-----------------|-----------------|-----------------------|--------|-------|------------------------------------|--------|-------|------------------------------|--------|--------|-----------------------------|--------|-------|-----------------------------|--------|-------|
|                 |                 | $\beta$               | 95% CI |       | $\beta$                            | 95% CI |       | $\beta$                      | 95% CI |        | $\beta$                     | 95% CI |       | $\beta$                     | 95% CI |       |
| PCB-138         | Decile 2 vs. 1  | -0.27                 | -0.62  | 0.08  | 0.35                               | -0.66  | 1.36  | -2.60                        | -17.24 | 12.03  | 0.00                        | -0.08  | 0.08  | 0.25                        | -0.06  | 0.55  |
|                 | Decile 3 vs. 1  | -0.09                 | -0.43  | 0.25  | 0.49                               | -0.50  | 1.48  | 3.41                         | -10.94 | 17.77  | 0.02                        | -0.07  | 0.10  | 0.03                        | -0.27  | 0.33  |
|                 | Decile 4 vs. 1  | -0.25                 | -0.60  | 0.10  | 0.08                               | -0.94  | 1.10  | -1.38                        | -16.15 | 13.39  | 0.01                        | -0.07  | 0.10  | 0.15                        | -0.16  | 0.46  |
|                 | Decile 5 vs. 1  | -0.15                 | -0.50  | 0.21  | 0.02                               | -1.00  | 1.05  | 3.31                         | -11.62 | 18.23  | 0.03                        | -0.06  | 0.11  | 0.22                        | -0.10  | 0.53  |
|                 | Decile 6 vs. 1  | -0.34                 | -0.69  | 0.01  | 0.49                               | -0.53  | 1.52  | 10.75                        | -4.09  | 25.58  | 0.01                        | -0.07  | 0.09  | 0.17                        | -0.14  | 0.49  |
|                 | Decile 7 vs. 1  | -0.28                 | -0.64  | 0.08  | 0.26                               | -0.77  | 1.30  | 12.36                        | -2.65  | 27.36  | 0.01                        | -0.07  | 0.10  | 0.29                        | -0.02  | 0.60  |
|                 | Decile 8 vs. 1  | -0.21                 | -0.56  | 0.15  | -0.48                              | -1.51  | 0.56  | -6.78                        | -21.74 | 8.18   | -0.01                       | -0.10  | 0.07  | 0.01                        | -0.31  | 0.32  |
|                 | Decile 9 vs. 1  | -0.14                 | -0.50  | 0.22  | 0.00                               | -1.05  | 1.05  | 4.84                         | -10.38 | 20.06  | 0.03                        | -0.06  | 0.11  | 0.15                        | -0.17  | 0.47  |
|                 | Decile 10 vs. 1 | 0.01                  | -0.35  | 0.36  | -0.28                              | -1.30  | 0.75  | 5.14                         | -9.70  | 19.98  | 0.01                        | -0.07  | 0.10  | 0.12                        | -0.20  | 0.43  |
|                 | PCB-153         | Decile 2 vs. 1        | 0.00   | -0.34 | 0.33                               | 0.70   | -0.28 | 1.69                         | -0.18  | -14.49 | 14.12                       | 0.05   | -0.03 | 0.12                        | 0.18   | -0.12 |
| Decile 3 vs. 1  |                 | 0.06                  | -0.28  | 0.40  | 0.54                               | -0.45  | 1.52  | 1.59                         | -12.75 | 15.92  | 0.01                        | -0.07  | 0.09  | 0.15                        | -0.15  | 0.45  |
| Decile 4 vs. 1  |                 | -0.31                 | -0.67  | 0.05  | 0.06                               | -0.99  | 1.10  | -0.76                        | -15.96 | 14.43  | 0.00                        | -0.08  | 0.09  | 0.27                        | -0.05  | 0.58  |
| Decile 5 vs. 1  |                 | -0.02                 | -0.37  | 0.34  | 0.19                               | -0.85  | 1.23  | 1.33                         | -13.75 | 16.42  | 0.05                        | -0.03  | 0.14  | 0.26                        | -0.06  | 0.57  |
| Decile 6 vs. 1  |                 | -0.27                 | -0.63  | 0.08  | 0.50                               | -0.54  | 1.54  | 5.31                         | -9.80  | 20.41  | 0.03                        | -0.05  | 0.11  | 0.22                        | -0.09  | 0.54  |
| Decile 7 vs. 1  |                 | -0.20                 | -0.56  | 0.16  | 0.40                               | -0.66  | 1.46  | 10.07                        | -5.31  | 25.45  | 0.07                        | -0.02  | 0.15  | 0.23                        | -0.09  | 0.55  |
| Decile 8 vs. 1  |                 | -0.21                 | -0.56  | 0.15  | -0.22                              | -1.25  | 0.81  | -5.36                        | -20.31 | 9.59   | -0.01                       | -0.09  | 0.08  | 0.08                        | -0.23  | 0.39  |
| Decile 9 vs. 1  |                 | -0.14                 | -0.51  | 0.23  | 0.27                               | -0.81  | 1.36  | 15.24                        | -0.50  | 30.99  | 0.03                        | -0.05  | 0.12  | 0.40                        | 0.07   | 0.73  |
| Decile 10 vs. 1 |                 | 0.14                  | -0.21  | 0.50  | -0.28                              | -1.33  | 0.77  | 1.41                         | -13.79 | 16.61  | 0.02                        | -0.06  | 0.11  | 0.11                        | -0.20  | 0.43  |
| PCB-180         |                 | Decile 2 vs. 1        | -0.12  | -0.47 | 0.23                               | 0.10   | -0.89 | 1.08                         | -1.55  | -16.11 | 13.00                       | 0.03   | -0.05 | 0.11                        | 0.19   | -0.12 |
|                 | Decile 3 vs. 1  | -0.07                 | -0.44  | 0.30  | -0.95                              | -2.00  | 0.11  | -1.87                        | -17.41 | 13.66  | -0.04                       | -0.12  | 0.05  | 0.14                        | -0.18  | 0.46  |
|                 | Decile 4 vs. 1  | -0.05                 | -0.43  | 0.33  | -0.09                              | -1.17  | 0.99  | 8.01                         | -7.89  | 23.91  | 0.01                        | -0.08  | 0.10  | 0.36                        | 0.03   | 0.69  |
|                 | Decile 5 vs. 1  | -0.25                 | -0.63  | 0.14  | 0.09                               | -1.00  | 1.18  | 0.01                         | -16.11 | 16.12  | 0.04                        | -0.05  | 0.12  | 0.17                        | -0.17  | 0.50  |
|                 | Decile 6 vs. 1  | -0.02                 | -0.41  | 0.36  | -0.23                              | -1.31  | 0.86  | -2.44                        | -18.45 | 13.57  | 0.05                        | -0.04  | 0.14  | 0.07                        | -0.26  | 0.41  |
|                 | Decile 7 vs. 1  | -0.15                 | -0.54  | 0.23  | -0.21                              | -1.31  | 0.88  | 0.58                         | -15.56 | 16.72  | 0.07                        | -0.02  | 0.15  | 0.18                        | -0.16  | 0.51  |
|                 | Decile 8 vs. 1  | -0.16                 | -0.54  | 0.23  | 0.12                               | -0.99  | 1.22  | 12.40                        | -3.92  | 28.73  | 0.04                        | -0.05  | 0.13  | 0.28                        | -0.05  | 0.62  |
|                 | Decile 9 vs. 1  | 0.04                  | -0.37  | 0.44  | -0.51                              | -1.66  | 0.64  | -0.97                        | -17.91 | 15.97  | -0.03                       | -0.12  | 0.07  | 0.09                        | -0.26  | 0.45  |
|                 | Decile 10 vs. 1 | -0.05                 | -0.44  | 0.33  | -0.84                              | -1.93  | 0.26  | 1.24                         | -14.91 | 17.38  | -0.02                       | -0.11  | 0.07  | 0.17                        | -0.17  | 0.50  |

Abbreviations: TSH: thyroid-stimulating hormone; T4: thyroxine; T3: triiodothyronine; 95% CI: 95% Confidence Interval.

For PCB-138: Decile 1=  $\leq 0.064$ , Decile 2=  $>0.064- \leq 0.105$ , Decile 3=  $>0.105- \leq 0.149$ , Decile 4=  $>0.149- \leq 0.187$ , Decile 5=  $>0.187- \leq 0.237$ , Decile 6=  $>0.237- \leq 0.285$ , Decile 7=  $>0.285- \leq 0.355$ , Decile 8=  $>0.355- \leq 0.450$ , Decile 9=  $>0.450- \leq 0.647$ , Decile 10=  $>0.647$

For PCB-153: Decile 1=  $\leq 0.082$ , Decile 2=  $>0.082- \leq 0.134$ , Decile 3=  $>0.134- \leq 0.195$ , Decile 4=  $>0.195- \leq 0.240$ , Decile 5=  $>0.240- \leq 0.287$ , Decile 6=  $>0.287- \leq 0.335$ , Decile 7=  $>0.335- \leq 0.417$ , Decile 8=  $>0.417- \leq 0.523$ , Decile 9=  $>0.523- \leq 0.668$ , Decile 10=  $>0.668$

For PCB-180: Decile 1=  $\leq 0.076$ , Decile 2=  $>0.076- \leq 0.129$ , Decile 3=  $>0.129- \leq 0.168$ , Decile 4=  $>0.168- \leq 0.207$ , Decile 5=  $>0.207- \leq 0.249$ , Decile 6=  $>0.249- \leq 0.299$ , Decile 7=  $>0.299- \leq 0.356$ , Decile 8=  $>0.356- \leq 0.433$ , Decile 9=  $>0.433- \leq 0.566$ , Decile 10=  $>0.566$

<sup>a</sup> All models adjusted for age, time of blood collection, and smoking status.

<sup>b</sup> TSH is ln-transformed and thus  $\beta$ -coefficients should be interpreted as follows: compared with exposure in decile 1, exposure in other deciles are associated with multiplicative changes in TSH of  $e^{\beta}$

<sup>c</sup> Other thyroid hormones and parameters are not transformed and thus  $\beta$ -coefficients should be interpreted as follows: compared with exposure in decile 1, exposure in other deciles are associated with additive changes in each hormone of  $\beta$ .

## References

Duntas LH, Brenta G. 2012. The effect of thyroid disorders on lipid levels and metabolism. *Med Clin North Am* 96:269-281.

Pucci E, Chiovato L, Pinchera A. 2000. Thyroid and lipid metabolism. *Int J Obes Relat Metab Disord* 24 Suppl 2:S109-112.

Reinehr T. 2010. Obesity and thyroid function. *Mol Cell Endocrinol* 316:165-171.

Rizos C, Elisaf M, Liberopoulos E. 2011. Effects of thyroid dysfunction on lipid profile. *Open Cardiovascular Medicine Journal* 5:76-84.

Tagliaferri M, Berselli ME, Calo G, Minocci A, Savia G, Petroni ML, et al. 2001. Subclinical hypothyroidism in obese patients: Relation to resting energy expenditure, serum leptin, body composition, and lipid profile. *Obes Res* 9:196-201.
